# Character displacement within the breeding area questions reinforcement in *Ficedula* flycatchers

Vladimir G. Grinkov<sup>1\*</sup>, Igor V. Palko<sup>2</sup>, Helmut Sternberg<sup>3</sup>

<sup>1</sup>Department of Biological Evolution, Faculty of Biology, Lomonosov Moscow State University, Moscow, Russian Federation

<sup>2</sup>Severtsov Institute of Ecology and Evolution, Russian Academy of Sciences, Moscow, Russian Federation

<sup>3</sup>OAG f. Populationsforschung Braunschweig, Braunschweig, Germany

\*Correspondence to: [grinkov@mail.bio.msu.ru](mailto:grinkov@mail.bio.msu.ru)

## Abstract

At present, studies of reinforcement should be focused on demonstrating how often this process occurs in nature and how important it is for speciation. Here we study the character displacement within the breeding area in the Pied Flycatcher to check the validity of the reinforcement in *Ficedula* flycatchers. We used point-referenced spatial data and a random forest to find the most important explanatory factors of the character displacement, and to reconstruct the phenotypic structure of the populations. The environmental temperature, and not the distance to sympatry, were proven to better describe the geographic pattern of the mean breeding plumage colour of the Pied Flycatcher populations. We conclude that ecologically distinct adaptations drive the morphological differentiation of the Old World flycatchers, and not reinforcement.

**Keywords:** character displacement, reinforcement, phenotypic structure, random forest, *Ficedula* flycatchers, pied flycatcher, collared flycatcher

## Introduction

Reinforcement (Dobzhansky 1937) is the process of enhancing reproductive isolation directly controlled by natural selection to cancel maladaptive hybridization between nascent species living together in the same territory (in sympatry). Often reinforcement is considered as one of the ways to complete the speciation process (Lewontin 1974; Servedio 2004). Scientific acceptance of the theory at the time of its appearance was very high, but in the eighties, it fell drastically (Noor 1999). To date, however, doubts about the existence of reinforcement have been resolved both by theoretical studies and by the identification of such cases in nature (Noor 1999; Servedio and Noor 2003; Butlin and Smadja 2018). Now researchers would change the focus of reinforcement studies to show how often this process occurs in nature and how important it is for speciation (Servedio

and Noor 2003). Therefore, we are addressing to answer these questions by the case study  
35 of the character displacement (Brown and Wilson 1956) within the breeding area in the  
Pied Flycatcher (*Ficedula hypoleuca*).

After the publication of Sætre et al. (Saetre et al. 1997), relationships between the  
Pied Flycatcher and the Collared Flycatcher (*F. albicollis*) had come to be considered one  
of the examples of reinforcement, although similar ideas were expressed several times  
40 before (Kral et al. 1988; Alatalo et al. 1990a; Lundberg and Alatalo 1992; Alatalo et al.  
1994). The Pied Flycatcher breeding range is many times larger than the one of the  
Collared Flycatcher (Fig. 1). Most of the Pied Flycatcher breeding area does not overlap  
with the one of the Collared Flycatcher (allopatric populations), while most of the Collared  
Flycatcher breeding range coincides with the breeding area of the Pied Flycatcher (Fig. 1).  
45 Where the ranges of these two species of flycatchers overlap (areas of sympatry, for  
example, in Central and Eastern Europe), males with a brown colouration of breeding  
plumage (brown morph) predominate in populations of the Pied Flycatcher. This  
colouration is very similar to that of females of this species. In the allopatric area (for  
example, in Fennoscandia), contrastingly coloured males with a black and white colour of  
50 the breeding plumage (black morph) predominate in populations of the Pied Flycatcher  
(Fig. 1 A and B). Such a biographical pattern of the morph ratio in the Pied Flycatcher is  
fundamental to the assumption that the character displacement within the breeding area of  
the species is the result of reinforcement (Saetre et al. 1997). However, the coupling of a  
high proportion of brown males with areas of sympatry in the Pied Flycatcher is revealed  
55 only for European populations, without analysing the phenotypic structure of those  
populations that breed in the most eastern European and the Asian part of the species  
breeding range (for example, in the European part of Russia to the Ural Mountains and  
further to Western Siberia, Fig. 1C).

In parallel with the publication of Sætre et al. (Saetre et al. 1997), it was nevertheless  
60 noted that the authors' conclusions indeed are based on limited material. "Both the  
phylogeny and the data on mate choice are based on limited sampling. The case for  
reinforcement will be more secure when the generality of the preferences has been  
established, and when a more complete picture of the biogeographic history of the  
flycatchers is available", wrote R. K. Butlin and T. Tregenza (Butlin and Tregenza 1997).  
65 However, these comments were not considered in the following studies (Noor 1999;  
Servedio and Noor 2003).

In this paper, we decided to follow the opinion of R. K. Butlin and T. Tregenza and  
conduct a biogeographic study of flycatchers on the largest material that we can obtain for  
analysis today. Specifically, we checked whether there is a relationship between the

70 prevailing breeding plumage colour in males and the remoteness of the Pied Flycatcher  
population from the breeding area of the Collared Flycatcher. To do this, we collected all  
the data known to us about the phenotypic structure of all populations of the Pied  
Flycatcher currently studied. We managed to find information for 41 populations. In  
addition, we analysed zoological collections from 11 museums. This allowed us to further  
75 evaluate the phenotypic structure of another 38 metapopulations of the Pied Flycatcher. To  
check whether the distance from the nesting area of the Collared Flycatcher may have an  
impact on the phenotypic structure of the Pied Flycatcher, we used a random forest as  
spatial predictions framework (Hengl et al. 2018). The extensive data sampling and spatial  
analyses usage largely distinguish our work from similar attempts, in which limited  
80 sampling and the linear regression models were used for these purposes (Laaksonen et al.  
2015).

## Material and Methods

### Basic methodological approach

We used point-referenced spatial data and a random forest for spatial predictions  
85 framework (RFsp) (Hengl et al. 2018) to find (1) the most important predictor variables  
highly related to the mean colour score of the males' breeding plumage of the Pied  
Flycatcher populations (response variable), and (2) a good parsimonious prediction model  
of the response variable for any point of the breeding range of the Pied Flycatcher. The  
RFsp was chosen because it can obtain equally accurate and unbiased predictions as other  
90 methods of spatial analysis (generalized linear model, different versions of kriging,  
geographically weighted regression) (Čeh et al. 2018; Hengl et al. 2018). The RFsp is  
thought to be advantageous over the other spatial analyses for the purpose of this  
research, as the former needs no rigid statistical assumptions about the distribution and  
stationarity of the target variable, it is more flexible towards incorporating, combining and  
95 extending covariates of different types, and information overlap (multicollinearity) and  
over-parameterization is not a problem for RFsp (Hengl et al. 2018). The distances from  
"observation points" to the border of the breeding area of the Collared Flycatcher and  
geographical coordinates (latitude and longitude) of "observation points" are used as  
explanatory variables, thus incorporating geographical proximity and geographical  
100 connection effects into the prediction process (Hengl et al. 2018). The "observation points"  
are *F. hypoleuca* population "centres" for which the mean breeding plumage colour score  
was obtained (see below). We used the average daily maximum temperature and its  
variability (standard deviation) as general climatic characteristics of the population habitat.  
We put thermal characteristics into the model as alternative explanatory variables, thus  
105 contrasting them with the distance to the sympatry area during the prediction process. We

used thermal characteristics in the analysis because it was shown that there is a low air temperature depression of the advertising behaviour of brown males in the Pied Flycatcher (Ilyina and Ivankina 2001; Kerimov et al. 2014), and this can lead to an increase in the proportion of black males in the reproductive part of the Pied Flycatcher population in cold spring years (Kerimov et al. 2014). Additionally, the basal metabolic rate (the amount of energy per unit time that an individual must spend to keep the body functioning at rest) and fledgling production of the males' morphs in the *F. hypoleuca* flycatcher were shown to be dependent on the ambient temperature (Sirkia et al. 2010; Kerimov et al. 2014).

### Data collection and preparation

Step 1. As a source of temperature data, we used The National Centers for Environmental Prediction (NCEP) / National Center for Atmospheric Research (NCAR) Reanalysis data set R-1, and NCEP / Department of Energy (DOE) Reanalysis II data set R-2 (Kalnay et al. 1996; Kanamitsu et al. 2002). The NCEP/NCAR R-1 and NCEP/DOE R-2 are high-quality, well-documented, freely available state-of-the-art gridded reanalysis data sets with global coverage of many relevant atmospheric variables spanning 1957 to present and 1979 to present, respectively (Kemp et al. 2012). Data for many variables are available at 17 pressure levels ranging from 1000 to 10 mb. Other variables describe conditions either at or near the surface. These data have a spatial resolution of 2.5 x 2.5 degrees and a temporal resolution of 6 h (00, 06, 12, 18 h UTC). We used the **RNCEP** package (version 1.0.8) of functions (Kemp et al. 2012) in the open-source R language to access required temperature data. First, using the *NCEP.gather* function from the **RNCEP** package, we loaded surface temperature data (variable *air.sig995* in data set) from April to May for each year in the interval spanning 1980 to 2015 for an area between 35- and 72-degrees north latitude and between -10- and 93-degrees longitude thus covering the breeding areas of the two species of flycatchers. Then using the *NCEP.restrict* function, we cut the interval from April 1 to April 14 and from May 16 to May 31, leaving the period from April 15 to May 15 for all loaded years. Finally, using the *NCEP.aggregate* function, we calculated the mean and standard deviation (SD) of daily maximum temperature for all loaded years, obtaining a point pattern of mean temperatures and SDs for the entire loaded area with a spatial resolution of 2.5 x 2.5 degrees of latitude x longitude. Similarly, we calculated the SD of the maximum daily temperature for May 1 for all years (the rendered thermal data map, see Fig. 2.). The latter assessment of variability mostly characterizes the repeatability or the predictability of temperature between years, and the former SD includes both inter-annual and intra-annual (inter-seasonal) variability, that is, a change in temperature from April 15 to May 15. Inter-seasonal temperature changes will be significantly higher for the continental climate than for the temperate climate. The selected interval spanning 1980 to

2015 seems to be sufficient both for obtaining an unbiased estimate of average temperatures and for a satisfactory assessment of its variability. The selected date interval, which lasts from April 15 to May 15, covers the period of birds' arrival from African wintering grounds, pairing and the beginning of reproduction in most of the populations of considered species of flycatchers. Since the key principle of geography is that "everything is related to everything else, but near things are more related than distant things" (Miller 2004), the climatic characteristics of earlier or later periods or months (March or June, for example) will be highly correlated with the chosen one. Temporal and spatial autocorrelations of temperature data are well-founded and documented facts in modern science, for example, see (Di Cecco and Gouhier 2018). Our goal was not to understand the temperature of which the nesting period determines the phenotypic composition of the population to a greater degree (causation task); this is a task for other studies. We evaluated which variable better predicts the values of the response variable (correlation task). And in this sense, temporal and spatial autocorrelations of the temperatures are not a nuisance for us, but a feature that improves our approach, since it allows a rather arbitrary choice of the period for calculating thermal estimates.

Step II. We were looking for any articles studying the Pied Flycatcher that mentioned the phenotypic structure of this species. Seven variants (types or morphs) were initially identified in the variability range of the male breeding plumage colour in the Pied Flycatcher (Drost 1936). The value 1 of this scale was assigned to the bright coloured black and white males, and the value 7 assigned to the brown coloured males. Accordingly, it is easy to calculate the average colour score of the population, which will describe well the proportion of males of different morphs. The closer the average colour score is to 1, the greater number of black males there are, the blacker is the population as a whole and vice versa; the closer to 7, the greater number of brown males in the population, the browner is the population. In most of the publications, the mean colour score is given, therefore in our work we also used this indicator as the main descriptor of the phenotypic structure. We were able to find information about the phenotypic structure of the Pied Flycatcher for 41 populations (or metapopulations) (Table S1). For each, we found the nearest well-recognized geographical point. Usually it was nearest settlement to which the studied bird population was attributed by the author(s). We found the geographic coordinates in the QGIS program for this point. This geographic point was the "observation point" for those populations whose data on the phenotypic structure were obtained from publications. We used data from the same author (or the same group of authors) for one territory from only one most recent publication. If for the same territory (or a close region) we found data from different authors, then we used all such data in the calculations.

Step III. The Pied Flycatcher studies in the western part of the breeding range were carried out much more often than in the eastern part resulting in a shifted distribution of observation points (Table S1). To compensate for data bias, we examined the collections of the following museums: [1] Siberian Zoological Museum of the Institute of Systematics and Ecology of the Siberian Branch of the Russian Academy of Sciences (Novosibirsk), [2] Collection of the Department of Biogeography of the Faculty of Geography of the M. V. Lomonosov Moscow State University (Moscow), [3] State Museum of Nature of the Kharkiv National V.N. Karazin University (Kharkiv), [4] Zoological Museum of Kyiv National Taras Shevchenko University (Kiev), [5] Zoological Museum of Lviv National I. Frank University (Lviv), [6] Zoological Museum of the Belarusian State University (Minsk), [7] Zoological Museum of the M. V. Lomonosov Moscow State University (Moscow), [8] Zoological Museum of the National Academy of Sciences of Ukraine (Kiev), [9] Zoological Museum of the Zoological Institute of the Russian Academy of Sciences (St. Petersburg), [10] Kirov City Zoological Museum (Kirov), [11] Kaunas Zoological T. Ivanauskas Museum (Kaunas), [12] Museum of Natural History of Tartu University (Tartu).

We examined the bird skin collection and determined the colour type of bird skins in museums [1] – [9]. Data on the colour type of 17 males were kindly provided by V. N. Sotnikov from [10]. We received digital photographs of 12 and 11 bird skins from [11] and [12], respectively, for subsequent colour typing. In total, we examined 471 birds' skins, of which 39 skins were excluded because some of them were clearly taken from migratory birds (autumn migration), and for some of them we could not accurately determine the location. Finally, we got colour types for 432 bird skins from museums [2] – [12] (no skin from museum [1] was included in the final data set; see Data S1). For each skin, the geographic coordinate was determined in the QGIS, based on the description of the place where the birds were caught written on the label.

Since the spatial resolution of temperature data was 2.5 x 2.5 degrees of a geographic coordinate, we used polygons of that size to form "populations" (small area populations) (Fig. S4). The minimum sample for a population was 5 individuals, because this number is enough to calculate the mean deviating by less than 1 point of the colour score (a pre-specified error bound) with a probability of 0.95 from the population total mean in a sample of 366 individuals with a standard deviation 1.13 (the population total mean sample size and the standard deviation were estimated in step II). If fewer individuals fell into some 2.5 x 2.5 degrees polygon, we included such individuals in the nearest polygons defined by the QGIS. Such individuals should not be located from the polygons in which they were included at a distance greater than 1.25 degrees (Fig. S4). After this procedure, there were still individuals that did not form populations or were not included in a population. In such

215 remaining cases, we gradually increased the size of the buffer from the geographical position of the individual, while the areas thus obtained began to overlap. If overlapping areas included 5 or more individuals, then we also considered them as the population for which the mean colour score was calculated (large area populations) (Fig. S4). We were unable to include 14 individuals in any of the populations using any of the above methods (Fig. S4). The "observation point" for populations formed by the skins from museum  
220 collections was calculated as the mean coordinate of all population components in QGIS (i.e. the centre of mass, and not the centroid which is the geometric centre of the population) (Fig. S4). We thus obtained 39 populations or observation points (Table S2).

As mentioned, not only breeding, but also migratory birds can get into museum collections. Also, the skin of birds can be collected purposefully of the same type or colour.  
225 It is relatively easy to separate autumn migrants by the bird life calendar and the plumage colouring (before the autumn migration, birds moult completely, and the colour of the post breeding plumage is quite different from the colour of the breeding one). However, in our opinion, it is impossible to separate spring migrants from local breeders. Thus, this problem was ignored by us, because we were unable to find criteria and procedures for  
230 cleaning the sample that would not lead to significant data loss. We found signs of directional collection of black males in only one case (the small standard deviation, a difference in the mean breeding plumage score from neighbouring populations) (Table S2). For one area in the sample of 6 individuals, there were five males with a colour score 2 and one male with a colour score 3. Such a ratio of morphs is almost impossible to obtain with  
235 a random selection method even in dark populations. This observation point was excluded from the analysis (Table S2).

Step IV. For two species of *F. hypoleuca* and *F. albicollis* flycatchers, we downloaded the distribution data (digitized georeferenced maps in geodatabase file format for use in GIS mapping software compiled by BirdLife International and Handbook of the Birds of the  
240 World) from BirdLife International (2018) IUCN Red List for birds, <http://www.birdlife.org> (downloaded from the site on 09.09.2018 using QGIS). We revealed that the bird findings from the Kola Peninsula, and from the northernmost and easternmost parts of the *F. hypoleuca* breeding area in Western Siberia, do not fall into the BirdLife International reproductive range of *F. hypoleuca*. To adjust the range of *F. hypoleuca*, we georeferenced  
245 in QGIS the species breeding area from the publication of Sirkia et al. (Sirkia et al. 2015). The final breeding range of *F. hypoleuca* basically contained the BirdLife International data, but the north-western borders were extended to the north and east to the coast of the Kola Peninsula, to the north of Western Siberia coinciding with the border from Sirkia et al.

(Sirkia et al. 2015) for this region, and to the very east of Western Siberia thus including  
250 data from museum collections for the area.

We did not include the Spanish (Iberian) and north-western African Atlas Flycatcher in the range of *F. hypoleuca* (Fig. 1). The birds of these territories are well isolated from other European *F. hypoleuca* populations (they can occur in one territory during a migration only), and they are phenotypically closer to each other (Corso et al. 2015; Potti et al. 2016). The  
255 Iberian form seems to be intermediate between the African form and *F. hypoleuca* in morphology (Sangster et al. 2004). It is recommended that the Atlas Flycatcher *F. speculigera* should be separated from the Pied Flycatcher *F. hypoleuca* as a species, and the Iberian form should be considered as subspecies *F. hypoleuca iberiae* of *F. hypoleuca* (Sangster et al. 2004). Sometimes, Iberian birds are also distinguished as a separate  
260 species (Potti et al. 2016). In both *F. speculigera* and *F. h. iberiae*, the colour of the breeding plumage in males is mainly black-and-white, and its variability is much less than among birds from the rest of Europe (Corso et al. 2015).

We also corrected the north-eastern boundary of the *F. albicollis* breeding range (Moscow is not included in the nesting range of this species), using Vabishchevich and  
265 Formozov (Vabishchevich and Formozov 2010) georeferenced distribution data. Southern Sweden, the islands of Öland, Gotland and Saaremaa were also excluded from the final *F. albicollis* breeding range due to the recent expansion of the species over the Baltic Sea thus following Laaksonen et al. (Laaksonen et al. 2015) (Fig. 1).

Step V. All data obtained in the previous steps were entered QGIS for their final  
270 assembly. For each *F. hypoleuca* observation point, the distance in kilometres to the boundary of the *F. albicollis* range was calculated (Fig. 1). If the observation point fell inside the *F. albicollis* range, the distance got negative values. Binding of the *F. hypoleuca* observation point to the thermal characteristics of the territory was carried out using the method of the nearest neighbour (the nearest point-referenced values of the thermal  
275 characteristics of the territory were chosen), as well as by Inverse Distance Weighted (IDW) interpolation using the 4 nearest points. We used the GRASS 7 v. *surf.idw* algorithm for surface interpolation from point-referenced data by the IDW interpolation for which region the *cellsize* was set to 2.5 (according with the spatial resolution of the temperature data), the power parameter was set to 3, and the number of interpolation points was set to 4.  
280 Then we used the point sampling tool to assign the interpolated value to the population observation point.

Thus, our initial model consisted of one response variable (the mean breeding plumage colour of *F. hypoleuca* males in the population) and 9 predictors: *Y* - latitude, *X* - longitude, *cf.dist* - distance to the border of the *F. albicollis* range, *mt* - mean maximum



285 daily temperature of the nearest temperature referenced point, *mt.idw* - IDW interpolated  
mean maximum daily temperature, *sd* - standard deviation of the maximum daily  
temperature from April 15 to May 15 spanning 1980 to 2015 of the nearest temperature  
referenced point, *sd.idw* - IDW interpolated standard deviation of the maximum daily  
290 temperature from April 15 to May 15 spanning 1980 to 2015, *sd.1d* - standard deviation of  
the maximum day temperature for May 1 spanning 1980 to 2015 of the nearest  
temperature referenced point, and finally *sd.1d.idw* - IDW interpolated standard deviation of  
the maximum day temperature for May 1 spanning 1980 to 2015.

### Spatial data analysis

We used the open-source R software environment for statistical computing and  
295 graphics (version 3.5.0) under an integrated development environment for R - RStudio  
(RStudio Desktop version 1.1.447) to analyse data assembled on step V. For regression  
tasks we used the **ranger** package (version 0.10.1) as an implementation of the random  
forests (Wright and Ziegler 2017). To obtain the most accurate predictions, the random  
forest parameters need to be optimised (Probst et al. 2018). To configure the parameters  
300 of the random forest, we used the **tuneRanger** (version 0.3) package (Probst et al. 2018)  
which allows model-based optimization for tuning strategy and the three parameters  
*min.node.size*, *sample.fraction* and *mtry* tuning at once. Out-of-bag predictions were used  
for evaluation. To evaluate the best *num.trees* parameter, we used the **caret** (version 6.0-  
80) package. We used a *trainControl* function from the package to set the resampling  
305 method to 10-fold cross-validation procedure. Validation was done by calculating the root  
mean squared error (RMSE). Thus, the initial model, which included all 9 predictors, was  
calculated with the following parameters of the random forest: *min.node.size*=8,  
*sample.fraction*=0.79, *mtry*=2, *num.trees*=250, *splitrule* = "variance", *importance*="impurity",  
*num.threads*=4, *verbose*=FALSE, *respect.unordered.factors*=TRUE, *replace*=FALSE,  
310 *keep.inbag*=TRUE. We obtained the coefficient of determination for the whole model ( $R^2$ )  
equal to 0.73 (out-of-bag predictions), and the mean squared error (MSE) equal to 0.24  
(out-of-bag prediction error). To build the most parsimonious prediction model of the  
response variable, i.e. to reduce the number of predictors with minimal impact on the  
response variable, we conducted a nested cross-validation procedure using the **caret**  
315 package. We estimated the 10-fold cross-validated prediction performance of models with  
a sequentially reduced number of predictors ranked by variable importance (the variables  
with the lowest variable importance values was sequentially excluded from the models) in  
100 repetitions (Fig. 3). In our case the variable importance was measured as the variance  
of the responses (Fig. 3C). Validation of the models was done by calculating the RMSE  
320 (Fig. 3A). The cross-validation procedure reduced 4 of 9 predictors (including the distance

to the *F. albicollis* breeding area), and the final model performance increased slightly, but statistically significantly (Fig. 3A, B). Thus, the final model included only 5 predictors listed below: *Y*, *X*, *mt*, *sd*, *sd.1d*. After excluding 4 predictors from the model, we again conducted the above procedure for the parameter's optimization of the random forest. The final model  
325 was calculated with the following parameters: *min.node.size*=11, *sample.fraction*=0.787, *mtry*=2, *num.trees*=250, *splitrule* = "variance", *importance*="impurity", *num.threads*=4, *verbose*=FALSE, *respect.unordered.factors*=TRUE, *replace*=FALSE, *keep.inbag*=TRUE. The  $R^2$  for the whole final model is 0.75, and the MSE is 0.23. To predict the mean breeding plumage colour score of males in the *F. hypoleuca* within the entire breeding range (to  
330 calculate out of sample data), we used the *predict.ranger* function in the **ranger** package with the final random forest model. The values of all 5 predictors obtained in step 1 for the area between 35- and 72-degrees north latitude and between -10- and 93-degrees longitude were used. We calculated the standard error of the predictions using the infinitesimal jack-knife for bagging methodology (Wager et al. 2014) as it implemented in the **ranger**  
335 package (Fig. 4, Fig. S2).

#### Data visualization

To visualize the results of spatial analysis, we transformed point-referenced data into raster surface data in the QGIS. For this, we used the GRASS 7 *v.surf.idw* algorithm for surface interpolation from point-referenced data by the IDW interpolation (region *cellsize*  
340 was set to 2.5, power parameter was set to 3, and number of interpolation points was set to 4). To improve the spatial resolution of raster data and to improve the visualization effect, we used the SAGA Resampling algorithm with upscaling and downscaling IDW interpolation. We changed the *cellsize* parameter to obtain the most acceptable visualization effect (usually, the parameter value was equal or less than 0.1). To draw all  
345 the other graphs, we used the **ggplot2** (Wickham 2016) (version 3.0.0) package in R. Final processing of the vector-based drawings was carried out in Inkscape™: Open Source Scalable Vector Graphics Editor (version 0.92.3), and the raster-based drawings was done in GNU Image Manipulation Program (GIMP) (version 2.10.4).

#### Modelling the influence of the *F. albicollis* flycatcher on the population phenotypic structure of the *F. hypoleuca* flycatcher

  
350

In the QGIS program, we modelled a hypothetical phenotypic structure of the *F. hypoleuca* populations, as if only one single factor was acting on the distance from the *F. albicollis* breeding range. This simulation was carried out only for visualization and was not used in statistical treatment. First, we transformed the *F. albicollis* range into a raster using  
355 the SAGA rasterize data/nodata algorithm, and then modelled the distance effect from the

borders using the *r.grow.distance* algorithm with the cell size parameter set to 1. The final visualization was done using the above data visualization methods (Fig. S3).

#### H. Löhrl data processing

360 The figure 2 given on page 271 of the H. Löhrl publication in Bonner Zoologische Beiträge (Löhrl 1965) was georeferenced in QGIS. We have downloaded freely accessible The Global Multi-resolution Terrain Elevation Data 2010 (GMTED2010) from the EarthExplorer site (<https://earthexplorer.usgs.gov/>) for the south-west of Germany and adjacent territories. We used the point sampling tool in QGIS to assign the terrain elevation values to the H. Löhrl observation points for further processing in R (Fig. 5).

#### 365 **Results**

A simple graphical analysis of the relationship between the mean colour score and the predictors showed that there are obvious non-linear dependencies in the data structure, including the dependence of the response variable on the distance from the observation point to the sympatry area (Fig. S1). In this regard, the use of linear models cannot be  
370 considered as a quite adequate method of analysing such data (Laaksonen et al. 2015).

The thermal characteristics of the area covering the ranges of the flycatcher species demonstrate a strong, but quite expected pattern of variability. Within the Pied Flycatcher distribution area, there is a pronounced south-north gradient of average daily maximum temperatures (Fig. 2). It is particularly pronounced between Central and Eastern Europe on  
375 the one hand and Fennoscandia on the other. The variability and predictability of thermal characteristics has a more complex geographic pattern, although in general there is a tendency to increase unpredictability eastward (an increase in the climate continentality as one moves deeper into Eurasia) (Fig. 2).

We used a spatially explicit approach to achieve two main objectives. Firstly, for the  
380 purposes of interpretation, we found the most important variables highly related to the population mean colour score of the males' breeding plumage of the Pied Flycatcher (response variable). Secondly, we found the smallest number of variables enough for a good parsimonious prediction of the mean colour score of the males' breeding plumage for any point of the breeding range of the Pied Flycatcher.

385 The random forest regression has shown that the distance to the breeding area of the Collared Flycatcher is of minimal importance for predicting the phenotypic structure of the Pied Flycatcher populations (Fig. 3). The average daily maximum temperature during the breeding season and its variability are associated with the predominant male colour morph in each population of the species (Fig. 3). Latitude and longitude also affect the  
390 phenotypic structure of the Pied Flycatcher populations (Fig. 3). This may indicate that we

did not include any other important variables associated with the geographical location of the population in the study.

Model predictions show that the predominance of black morphs in males is observed in the Pied Flycatcher populations nesting in areas with a predictably colder environment (Fennoscandia and the British Isles) (Fig. 4, Fig. S2). Brown-coloured males predominate in populations nesting in a relatively warm and/or very unstable climate. Populations with a predominance of brown morphs form the entire southern region of the breeding range of the Pied Flycatcher, including the most Eastern European part and the Western Siberian part. Moreover, the populations in which the average values of the colour score reach maximum values (more brown morphs in the population) are outside the breeding range of the Collared Flycatcher – these are central and northern Germany, and the Netherlands (Fig. 4). In sympatry, the phenotypic structure of the Pied Flycatcher populations also changes (Fig. 4), and these changes have a much more complex spatial pattern compared to what one would assume if the mere presence/absence of another species would influence the phenotypic structure of sympatric populations (Fig. S3).

## Discussion

The study of the mechanisms of speciation in the Old World flycatchers of the genus *Ficedula*, unfortunately, recalls the very case when the cart was putted before the horse. Acceptance of reinforcement as the main factor of speciation in the *Ficedula* flycatchers and as the mechanism of maintaining intraspecific variability in one of them (Saetre and Saether 2010) occurred even though the biogeographic pattern of phenotypic structure was not revealed for the whole breeding area of the interacted species, and the generality of the female preferences for male breeding plumage was not established.

Surprisingly, data on the mainly brown coloration of the males' breeding plumage of the Pied Flycatcher in Western Siberia were available in the scientific literature (Johansen 1954). Apparently, this information was not widely known. This fact alone would be enough to cast doubt on the generality of the coupling between the character displacement and the areas of sympatry. Now we can say with high certainty that no convincing evidence of the coincidence of the character displacement and the sympatry areas of the flycatchers exist (Fig. 4). Our studies persuasively show that the geographic pattern of variability of the mean colour score of males' breeding plumage in the Pied Flycatcher is much more complicated and cannot be caused solely by interspecific interactions (Fig. 1, Fig. 4 and Fig. S3). For example, the shift of male breeding plumage colouration occurs in the sympatry, but also in the allopatry in most eastern parts of the breeding range of the Pied Flycatcher up to the eastern distribution boundaries in Western Siberia, that is, the most remote populations from the areas of sympatry (Fig. 1 and Fig. 4).

It is crucially important that if reinforcement is inferred from displacement in a secondary male sexual character, the displacement must be detectable by females; and females should use these characters for a mate choice (Howard 1993; Noor 1999). In addition to the publication of Sætre et al. (Saetre et al. 1997), some other studies reveal that a female preferably chooses a black male in allopatric populations of the Pied Flycatcher (Roskaft and Jarvi 1983; Saetre et al. 1994; Dale and Slagsvold 1996). However, there are also several studies done by independent researchers about different allopatric populations in which no clear benefits for black morphs in mate choice were found (Alatalo et al. 1986; Alatalo et al. 1990b; Potti and Montalvo 1991; Lehtonen et al. 2009; Sirkia and Laaksonen 2009). This indicates that the generality of the female preferences for male breeding plumage in the Pied Flycatcher also cannot be considered a fully proven phenomenon.

We think that if the female perceives the male breeding plumage colour as a cue to select a mate, this male trait is not the main one for mate choice or not used at all. For example, it was recently shown that the intensity of the advertising behaviour of free-living males of the Pied Flycatcher is modified by ambient air temperatures in the Moscow Region population (Russia, European part). Black males can maintain a high intensity of advertising behaviour at both low and high temperatures. However, brown males are able to attract females effectively only at higher air temperatures, and at low temperatures reduce dramatically the intensity of advertising behaviour (Ilyina and Ivankina 2001; Kerimov et al. 2014). Quite similar results were obtained in the experiments in the Tomsk population (Russia, Western Siberia) of the Pied Flycatcher. It was shown that females choose black males at low ambient temperatures merely because they are more active (Kerimov et al. 2014). Moreover, it was possible to demonstrate that this mechanism influences the morph ratio in the reproductive part of the population – in years with a cold spring, more black males enter the reproductive part of the Tomsk population, apparently due to the temperature-related depression of the brown males' advertising behaviour (Kerimov et al. 2014). In the literature, there is also evidence that the ambient temperature can affect the reproductive success and the energetics of the morphs. The reproductive output of black males was shown to be the highest when it was cold during egg-laying but warm during the nestling period, whereas the fledgling production of brown males was highest when it was continuously warm (Sirkia et al. 2010). Brown males increase a basal metabolic rate (BMR; the amount of energy per unit time that an individual must spend to keep the body functioning at rest) under the influence of low ambient temperatures, and black males, on the contrary, retain the same level of BMR in a very wide range of daily temperatures (Kerimov et al. 2014). It is likely that the opposed results of earlier studies of female morph preferences could be obtained because the temperature dependence of the

465 males' energetics and behaviour was not considered. To date, data from Sætre et al. (Saetre et al. 1997) remain the only "strong" evidence of reinforcement (Saetre and Saether 2010) (all others are not an exclusive prerogative of reinforcement) (Noor 1999; Butlin and Smadja 2018). Therefore, the replication of the experiments of Sætre et al. (Saetre et al. 1997) to check the female preferences is necessary on a more extensive material, considering the new information about the dependence of the males' advertising behaviour on ambient temperatures.

475 The coupling of males' breeding plumage colour variability with weather characteristics in the Pied Flycatcher was noted in one of the first studies devoted to this issue. Löhrl (Löhrl 1965) described a very interesting picture of the spatial segregation of male morphs of the Pied Flycatcher and the Collared Flycatcher. He showed that in south-west Germany brown and black males of the Pied Flycatcher are separated from each other spatially, as well as from the Collared Flycatcher (Fig. 5). Brown males occupied the forests of the lowest lands, the Collared Flycatcher occupied the forests at medium height above sea level, and the black males nested in the highest mountain forests. Such a clear spatial segregation between two species and morphs cannot be explained by a simple interference competition over nest cavities, where the collared flycatcher is a winner (Saetre and Saether 2010). This habitat segregation on such a spatial scale can only be the result of an active habitat choice. Indeed, there is experimental evidence for species-specific habitat preferences in two flycatcher species in their hybrid zone (Adamik and Bures 2007).

485 All these data can be regarded as evidence considering that the evolution of the plumage colour in the Pied Flycatcher is not driven by reinforcement but is the result of the adaptation of black males to the conditions of higher mountains forests, and brown ones – to the conditions of lower-altitude forests. Then the distribution of brown and black populations of the Pied Flycatcher along the modern breeding area is a projection of adaptations to different ecological subniches that the species have developed in refugia during the last glaciation (*F. albicollis* in Italy, and *F. hypolueca* on the Iberian Peninsula) and their subsequent evolution (Saetre and Saether 2010).

495 It is very likely that the initial stages of the *F. hypolueca* species formation took place in the relatively higher-altitude conditions of the north of the Iberian Peninsula refuge during Quaternary ice ages (for the European paleoenvironments and maximum extent of ice, for example, see (Tzedakis et al. 2013). Further, as the glaciation receded, the *F. hypolueca* began to expand earlier along its current range, since there are no physical obstacles in this refugium like the Alps in the north of the Apennine Peninsula. Probably, as a result of this expansion, an adaptation to breeding in lower-altitude forests evolved,

500 marked by the brown colour of the male breeding plumage. The expansion of the *F.*  
*albicollis* from its Italian refuge could be limited to the Alps for some time. As a result,  
when *F. albicollis* began to spread over its existing range, it encountered the brown *F.*  
*hypolueca* populations that had spread a little bit earlier. In contact zones the species  
effectively diverged to different ecological niches, although the *F. albicollis* remained a  
505 more stenobiont species (Qvarnstrom et al. 2010). At present, the species are so well  
segregated ecologically that there may be no competition for microhabitats and nesting  
sites between them (Walankiewicz et al. 1997; Adamik and Bures 2007; Czeszczewik et al.  
2012). Therefore, it seems very likely that the black *F. hypolueca* populations have never  
shared the same habitats with the *F. albicollis* throughout the entire evolutionary history of  
510 these species! Thus, at present the British Isles and Fennoscandia are inhabited by black  
males preadapted to higher-altitude forests (ancestral state), and the southern and eastern  
parts of the Pied Flycatcher range are inhabited by brown males adapted to lower-altitude  
forests (newly evolved state). Thus, there is a clear ecological background for the evolution  
of the breeding plumage colour in the Pied Flycatcher males as an alternative for  
515 reinforcement including ecological adaptation, niche differentiation, and ecological  
character displacement.

In theoretical studies it was noted that in order to attribute mate choice patterns to  
reinforcement it was necessary that the character displacement must not have occurred  
for other, especially ecological reasons (Howard 1993; Noor 1999). This requirement is one  
520 where many studies have failed (Howard 1993; Noor 1999), and the reinforcement in  
*Ficedula* flycatchers seems to have to fill their numbers.

### **Acknowledgments**

We are very grateful to our colleagues from museums and universities for their support in  
collecting data: A.M. Peklo, L.N. Prokopchuk, A.A. Atemasov, V.F. Chernikov, Y.A. Redkin,  
525 P.S. Tomkovich, M.V. Kalyakin, L.G. Emelyanova, A.D. Pisanenko, E.A. Srebrodolskaya, A.V.  
Bokotey, V.M. Loskot, V.N. Sotnikov, A.I. Milutin, S. Rumbutis, A.P. Vabishchevich. We are  
thankful to N.A. Formozov for consultations. We are grateful to K. Henne for improving the  
English language of an earlier version of the manuscript.

**Funding:** This work was supported by the Russian Fund of Basic Research RFBR (project  
530 18-04-00536-a) and the State Assignment Ch. 2 CITIS AAAA-A16-116021660031-5.

**Author contributions:** The conceptualization, data curation, funding acquisition,  
investigation, methodology, resources, validation, visualization, review, and editing were  
equally distributed among co-authors. Besides the listed, V.G. Grinkov was responsible for  
supervision, project administration, formal statistical analysis, and writing the original draft.

535 **Competing interests:** The authors declare no competing interests.

**Data and materials availability:** All data and software are available in the main text, the supplementary materials, and on the internet sites for purposes of reproducing the results or extending the analysis.

**Software and data sources:**

- 540 Quantum GIS Development Team. 2013. QGIS Geographic Information System. Open Source Geospatial Foundation Project. <https://qgis.org>
- R Core Team. 2018. R: A language and environment for statistical computing. R Foundation for Statistical Computing, Vienna, Austria. <https://www.r-project.org/>
- RStudio Team. 2016. RStudio: Integrated Development for R. RStudio, Inc. Boston, MA.  
545 <http://www.rstudio.com/>.
- Environmental Prediction (NCEP)/National Center for Atmospheric Research (NCAR) Reanalysis data set R-1. URL  
<http://www.cpc.ncep.noaa.gov/products/wesley/reanalysis.html>
- Environmental Prediction (NCEP)/Department of Energy (DOE) Reanalysis II data set R-2.  
550 URL <http://www.cpc.ncep.noaa.gov/products/wesley/reanalysis2/index.html>
- Global Multi-resolution Terrain Elevation Data 2010 (GMTED2010). the EarthExplorer. URL  
<https://earthexplorer.usgs.gov/>
- Species distribution data compiled by BirdLife International and Handbook of the Birds of the World from BirdLife International (2018) IUCN Red List for birds. URL  
555 <http://www.birdlife.org>

**Literature Cited**

- Adamik, P. and S. Bures. 2007. Experimental evidence for species-specific habitat preferences in two flycatcher species in their hybrid zone. *Naturwissenschaften* 94:859-863.
- 560 Alatalo, R. V., D. Eriksson, L. Gustafsson, and A. Lundberg. 1990a. Hybridization between Pied and Collared Flycatchers - Sexual selection and speciation theory. *J Evolution Biol* 3:375-389.
- Alatalo, R. V., L. Gustafsson, and A. Lundberg. 1994. Male coloration and species recognition in sympatric flycatchers. *P R Soc B* 256:113-118.
- 565 Alatalo, R. V., A. Lundberg, and C. Glynn. 1986. Female pied flycatchers choose territory quality and not male characteristics. *Nature* 323:152-153.
- Alatalo, R. V., A. Lundberg, and J. Sundberg. 1990b. Can female preference explain sexual dichromatism in the pied flycatcher, *Ficedula hypoleuca*. *Anim Behav* 39:244-252.



- Anorova, N. S. 1977. Colour morphs of the Pied Flycatcher males breeding on south  
570 Moscow area. Bulletin of Moscow Society of Naturalists. Biological series 82:10-18.
- Belskii, E. A. and A. G. Lyakhov. 2004. Breeding plumage coloration in *Ficedula hypoleuca*  
(Passeriformes, Muscicapidae) males from the Middle Urals. Zool Zh 83:1468-1475.
- Bijlsma, R. G. and C. Both. 2014. Bonte Vliegenvangers *Ficedula hypoleuca* broedend in  
natuurlijke holtes: verschillen met nestkastbewoners. Drentse Vogels 28:114-125.
- 575 Brown, W. L. and E. O. Wilson. 1956. Character displacement. Systematic Zoology 5:49-64.
- Butlin, R. K. and C. M. Smadja. 2018. Coupling, reinforcement, and speciation. The  
American Naturalist 191:155-172.
- Butlin, R. K. and T. Tregenza. 1997. Is speciation no accident? Nature 387:551.
- Čeh, M., M. Kilibarda, A. Liseč, and B. Bajat. 2018. Estimating the performance of random  
580 forest versus multiple regression for predicting prices of the apartments. ISPRS  
International Journal of Geo-Information 7:168.
- Corso, A., O. Janni, M. Viganò, and L. Starnini. 2015. Atlas Pied Flycatcher: variability of  
identification characters. Dutch Birding 37:141-160.
- Curio, E. 1959. Beiträge zur Populationsökologie des Trauerschnäppers (*Ficedula h.*  
585 *hypoleuca* Pallas). Zoologische Jahrbücher 87:185-230.
- Czeszczewik, D., I. Ruczyński, K. Zieba-Schraven, J. Wisniewska, and W. Walankiewicz.  
2012. The Pied and the Collared Flycatcher do not compete for microhabitats in the  
Bialowieza Forest. Belg J Zool 142:133-137.
- Dale, S. and T. Slagsvold. 1996. Mate choice on multiple cues, decision rules and sampling  
590 strategies in female pied flycatchers. Behaviour 133:903-944.
- Di Cecco, G. J. and T. C. Gouhier. 2018. Increased spatial and temporal autocorrelation of  
temperature under climate change. Sci Rep-Uk 8:14850.
- Dobzhansky, T. 1937. Genetics and the Origin of Species.-New York, Columbia Univ. Press.  
Columbia University Press, New York.
- 595 Drost, R. 1936. Über das Brutkleid männlicher Trauerfliegenfänger, *Muscicapa hypoleuca*.  
Vogelzug 6:179-186.
- Eggenberger, H. 1964. Über die Farbtypen der männlichen Trauerschnäpper, *Ficedula*  
*hypoleuca*, in der Ostschweiz. Ornithologische Beobachter 61:95-99.
- Glutz von Blotzheim, U. N. and K. M. Bauer (eds). 1993. *Ficedula hypoleuca* (Pallas 1764)  
600 Trauerfliegenschnäpper, Trauerschnäpper. Pp. 165-263 in Handbuch der Vögel

Mitteleuropas. Bd. 13/1: Passeriformes (4. Teil). Muscicapidae - Paridae. . AULA-Verlag, Wiesbaden.

- 605 Grinkov, V. G. 1997. Male plumage variation in the pied flycatcher (*Ficedula hypoleuca* Pall.) and its relation with offspring quality. Possibility of phenotype diversity maintenance by disruptive selection. *Dokl Akad Nauk+* 356:138-140.
- Haverschmidt, F. 1973. Waarnemingen aan een populatie Bonte Vliegenvangers *Ficedula hypoleuca*. *Limosa* 46:1-20.
- 610 von Haartman, L. 1985. The biological significance of the nuptial plumage of the male Pied Flycatcher. Pp. 34-60 in V. D. Ilyichev, and V. M. Gavrilov, eds. ACTA XVIII Congressus Internationalis Ornithologici, Moscow, August 16-24, 1982. "Nauka", Moscow.
- Hengl, T., M. Nussbaum, M. N. Wright, G. B. M. Heuvelink, and B. Gräler. 2018. Random forest as a generic framework for predictive modeling of spatial and spatio-temporal variables. *Peerj* 6:e5518.
- 615 Howard, D. J. 1993. Reinforcement: Origin, dynamics, and fate of an evolutionary hypothesis. Pp. 46–69 in R. G. Harrison, ed. *Hybrid zones and the evolutionary process*. Oxford University Press, New York.
- 620 Ilyina, T. A. and E. V. Ivankina. 2001. Seasonal variation of vinging activity and relative effect of the advertising behaviour of males with different plumage colour in the Pied Flycatcher *Ficedula hypoleuca*. *Acta Ornithol* 36:85-89.
- Ivankina, E. V., A. B. Kerimov, V. G. Grinkov, and A. V. Bushuev. 2007. Structural and functional aspects of variation of the breeding plumage ornamentation in the male Pied Flycatcher *Ficedula hypoleuca* (Aves : Passeriformes). *Zh Obshch Biol* 68:278-295.
- 625 Johansen, H. 1954. Die Vogelfauna Westsibiriens. *J Ornithol* 95:64-111.
- Kalnay, E., M. Kanamitsu, R. Kistler, W. Collins, D. Deaven, L. Gandin, M. Iredell, S. Saha, G. White, J. Woollen, Y. Zhu, M. Chelliah, W. Ebisuzaki, W. Higgins, J. Janowiak, K. C. Mo, C. Ropelewski, J. Wang, A. Leetmaa, R. Reynolds, R. Jenne, and D. Joseph. 1996. The NCEP/NCAR 40-Year Reanalysis Project. *Bulletin of the American*
- 630 *Meteorological Society* 77:437-472.
- Kanamitsu, M., W. Ebisuzaki, J. Woollen, S.-K. Yang, J. J. Hnilo, M. Fiorino, and G. L. Potter. 2002. NCEP–DOE AMIP-II Reanalysis (R-2). *Bulletin of the American Meteorological Society* 83:1631-1644.

- 635 Kemp, M. U., E. Emiel van Loon, J. Shamoun-Baranes, and W. Bouten. 2012. RNCEP: global weather and climate data at your fingertips. *Methods Ecol Evol* 3:65-70.
- Kerimov, A. B., V. G. Grinkov, E. V. Ivankina, T. A. Ilyina, and A. V. Bushuev. 2014. The influence of spring temperature on the intensity of advertising behavior and basal metabolic rate in bright and pale Pied Flycatcher (*Ficedula Hypoleuca*) Males. *Zool Zh* 93:1288-1302.
- 640 Kral, M., T. Jarvi, and V. Bıcık. 1988. Inter-specific aggression between the Collared Flycatcher and the Pied Flycatcher - the selective agent for the evolution of light-colored male Pied Flycatcher populations. *Ornis Scand* 19:287-289.
- Laaksonen, T., P. M. Sirkia, S. Calhim, J. E. Brommer, P. K. Leskinen, C. R. Primmer, P. Adamik, A. V. Artemyev, E. Belskii, C. Both, S. Bures, M. D. Burgess, B. Doligez, J. T. 645 Forsman, V. Grinkov, U. Hoffmann, E. Ivankina, M. Kral, I. Krams, H. M. Lampe, J. Moreno, M. Magi, A. Nord, J. Potti, P. A. Ravussin, and L. Sokolov. 2015. Sympatric divergence and clinal variation in multiple coloration traits of *Ficedula* flycatchers. *J Evolution Biol* 28:779-790.
- Lehtonen, P. K., C. R. Primmer, and T. Laaksonen. 2009. Different traits affect gain of 650 extrapair paternity and loss of paternity in the pied flycatcher, *Ficedula hypoleuca*. *Anim Behav* 77:1103-1110.
- Lewontin, R. C. 1974. *The genetic basis of evolutionary change*. Columbia University Press New York.
- Löhr, V. H. 1965. Zwei regional und ökologisch getrennte Formen des Trauerschnäppers 655 (*Ficedula hypoleuca*) in Südwestdeutschland. *Bonner Zoologische Beiträge* 16:268 - 283.
- Lundberg, A. and R. V. Alatalo. 1992. *The Pied Flycatcher*. T & AD Poyser Ltd., London.
- Miller, H. J. 2004. Tobler's first law and spatial analysis. *Annals of the Association of American Geographers* 94:284-289.
- 660 Noor, M. A. F. 1999. Reinforcement and other consequences of sympatry. *Heredity* 83:503-508.
- Nyholm, N. E. I. and H. E. Myhrberg. 1983. Breeding area fidelity of the pied flycatcher *Ficedula hypoleuca* at Ammarnäs, Swedish Lapland. *Ornis Fennica* 60:22-27.
- Potti, J., J. L. Copete, C. Gutierrez-Exposito, and C. Camacho. 2016. Morphological and 665 sexual traits in Atlas and Iberian Pied Flycatchers *Ficedula hypoleuca speculigera* and *F-h. iberiae*: a comparison. *Bird Study* 63:330-336.

- Potti, J. and S. Montalvo. 1991. Male arrival and female mate choice in Pied Flycatchers *Ficedula-Hypoleuca* in central Spain. *Ornis Scand* 22:45-54.
- 670 Probst, P., M. Wright, and A.-L. Boulesteix. 2018. Hyperparameters and tuning strategies for random forest. *arXiv:1804.03515*.
- Qvarnstrom, A., A. M. Rice, and H. Ellegren. 2010. Speciation in *Ficedula* flycatchers. *Philos T R Soc B* 365:1841-1852.
- Ristow, D. 1975. *Der Trauerschnäpper (Ficedula hypoleuca) in der Eifel und im Kottenforst bei Bonn*. Kilda-Verlag, Greven.
- 675 Roskaft, E. and T. Jarvi. 1983. Male plumage color and mate choice of female Pied Flycatchers *Ficedula hypoleuca*. *Ibis* 125:396-400.
- Roskaft, E., T. Jarvi, N. E. I. Nyholm, M. Virolainen, W. Winkel, and H. Zang. 1986. Geographic variation in secondary sexual plumage color characteristics of the male Pied Flycatcher. *Ornis Scand* 17:293-298.
- 680 Saetre, G. P., S. Dale, and T. Slagsvold. 1994. Female Pied Flycatchers prefer brightly colored males. *Anim Behav* 48:1407-1416.
- Saetre, G. P., T. Moum, S. Bures, M. Kral, M. Adamjan, and J. Moreno. 1997. A sexually selected character displacement in flycatchers reinforces premating isolation. *Nature* 387:589-592.
- 685 Saetre, G. P. and S. A. Saether. 2010. Ecology and genetics of speciation in *Ficedula* flycatchers. *Mol Ecol* 19:1091-1106.
- Sangster, G., J. M. Collinson, A. J. Helbig, A. G. Knox, and D. T. Parkin. 2004. Taxonomic recommendations for British birds: second report. *Ibis* 146:153-157.
- Servedio, M. R. 2004. The what and why of research on reinforcement. *Plos Biol* 2:e420-  
690 e420.
- Servedio, M. R. and M. A. F. Noor. 2003. The role of reinforcement in speciation: theory and data. *Annual Review of Ecology, Evolution, and Systematics* 34:339-364.
- Sirkia, P. M., P. Adamik, A. V. Artemyev, E. Belskii, C. Both, S. Bures, M. Burgess, A. V. Bushuev, J. T. Forsman, V. Grinkov, D. Hoffmann, A. Jarvinen, M. Kral, I. Krams, H. M. Lampe, J. Moreno, M. Magi, A. Nord, J. Potti, P. A. Ravussin, L. Sokolov, and T. Laaksonen. 2015. Fecundity selection does not vary along a large geographical cline of trait means in a passerine bird. *Biol J Linn Soc* 114:808-827.
- 695 Sirkia, P. M. and T. Laaksonen. 2009. Distinguishing between male and territory quality: females choose multiple traits in the pied flycatcher. *Anim Behav* 78:1051-1060.

- 700 Sirkia, P. M., M. Virolainen, and T. Laaksonen. 2010. Melanin coloration has temperature-dependent effects on breeding performance that may maintain phenotypic variation in a passerine bird. *J Evolution Biol* 23:2385-2396.
- Sternberg, H. 1964. Untersuchungen über die Farbtypenzugehörigkeit der männlichen Trauerschnäpper, *Ficedula hypoleuca*, im Schweizerischen Mittelland.
- 705 *Ornithologische Beobachter* 61:90–94.
- Sternberg, H., V. G. Grinkov, E. V. Ivankina, T. A. Ilyina, A. B. Kerimov, and A. Schwarz. 2002. Evaluation of the size and composition of nonbreeding surplus in a Pied Flycatcher *Ficedula hypoleuca* population: Removal experiments in Germany and Russia. *Ardea* 90:461-470.
- 710 Trettau, W. 1952/53. Planberingung des Trauerfliegenschnäppers (*Muscicapa hypoleuca*) in Hessen. *Vogelwarte - Zeitschrift für Vogelkunde* 16:89-95.
- Trettau, W. and F. Merkel. 1943. Ergebnisse einer Planberingung des Trauerfliegenschnäppers (*Muscicapa hypoleuca* Pallas) in Schlesien. *Vogelzug* 14:77-90.
- 715 Tzedakis, P. C., B. C. Emerson, and G. M. Hewitt. 2013. Cryptic or mystic? Glacial tree refugia in northern Europe. *Trends Ecol Evol* 28:696-704.
- Vabishchevich, A. P. and N. A. Formozov. 2010. Song variability in Pied Flycatchers *Ficedula hypoleuca*: impact of the sympatry with Collared Flycatchers *F. albicollis*. *Acta Ornithol* 45:189-202.
- 720 Vysotsky, V. G. 1995. Coloring of male pied flycatchers and its relationship with other characters. *Ornitologiya* 26:28-32.
- Wager, S., T. Hastie, and B. Efron. 2014. Confidence Intervals for random forests: the jackknife and the infinitesimal jackknife. *Journal of machine learning research : JMLR* 15:1625-1651.
- 725 Walankiewicz, W., C. Mitrus, D. Czeszczewik, and P. M. Jablonski. 1997. Is the Pied Flycatcher *Ficedula hypoleuca* overcompeted by the Collared Flycatcher *Ficedula albicollis* in the natural forest of Bialowieza? *Acta Ornithol* 2:213-217.
- Wickham, H. 2016. *ggplot2: Elegant graphics for data analysis*. Springer-Verlag, New York.
- Winkel, W., D. Richter, and R. Berndt. 1970. Über Beziehungen zwischen Farbtyp und Lebensalter männlicher Trauerschnäpper (*Ficedula hypoleuca*). *Vogelwelt* 91:161-170.
- 730

Winkel, W. and D. Winkel. 1984. Polygynie des Trauerschnäppers (*Ficedula hypoleuca*) am Westrand seines Areals in Mitteleuropa. *J Ornithol* 125:1-14.

735 Wright, M. N. and A. Ziegler. 2017. ranger: A fast implementation of random forests for high dimensional data in C++ and R. *Journal of Statistical Software* 77:17.

Zang, H. 1975. Populationsstudien am Trauerschnäpper (*Ficedula hypoleuca*) im Bergwald des Harzes als einem suboptimalen Habitat. *Vogelwelt* 96:161-184.

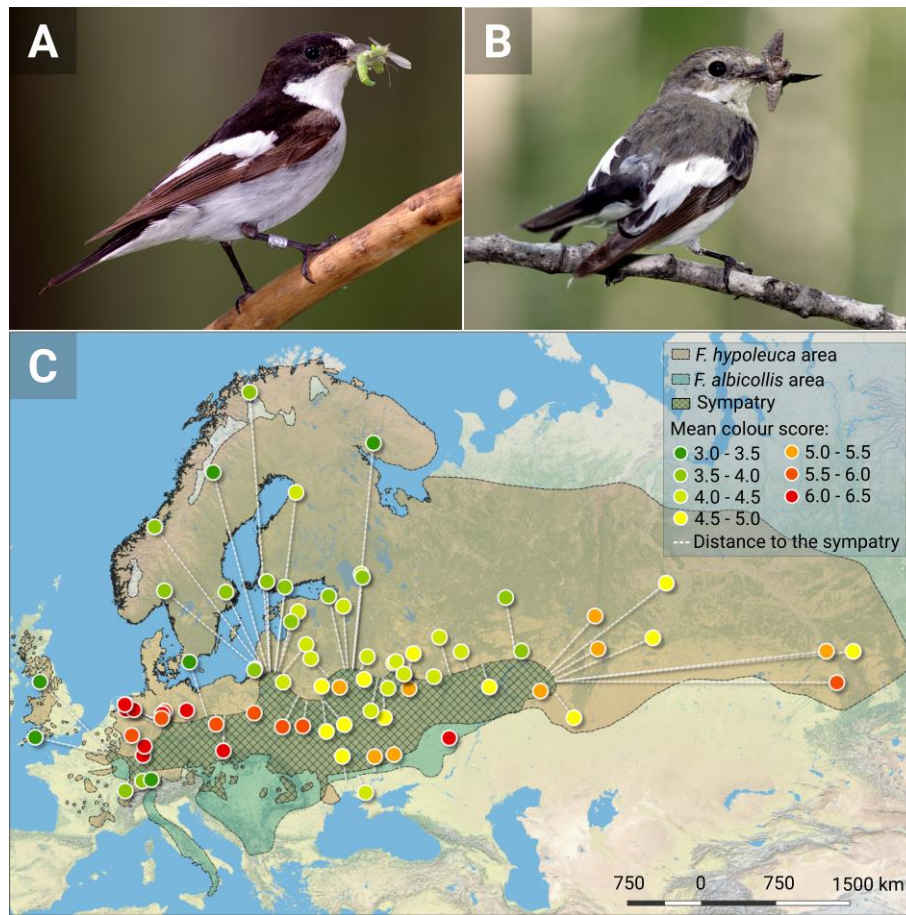

740

**Fig. 1. The variability of the male breeding plumage colour and the mean colour score in populations of the Pied Flycatcher (*F. hypoleuca*).**

745 (A) The contrast-coloured male (black morph). (B) The less bright male (brown morph). (C) The mean colour score in populations breeding in different parts of the Pied Flycatcher *F. hypoleuca* range. For each observation point, the distance to the border of the Collared Flycatcher *F. albicollis* is shown. Photos (A) and (B) credits: Vladimir G. Grinkov. Map source: the U.S. National Park Service (NPS) Natural Earth physical map.

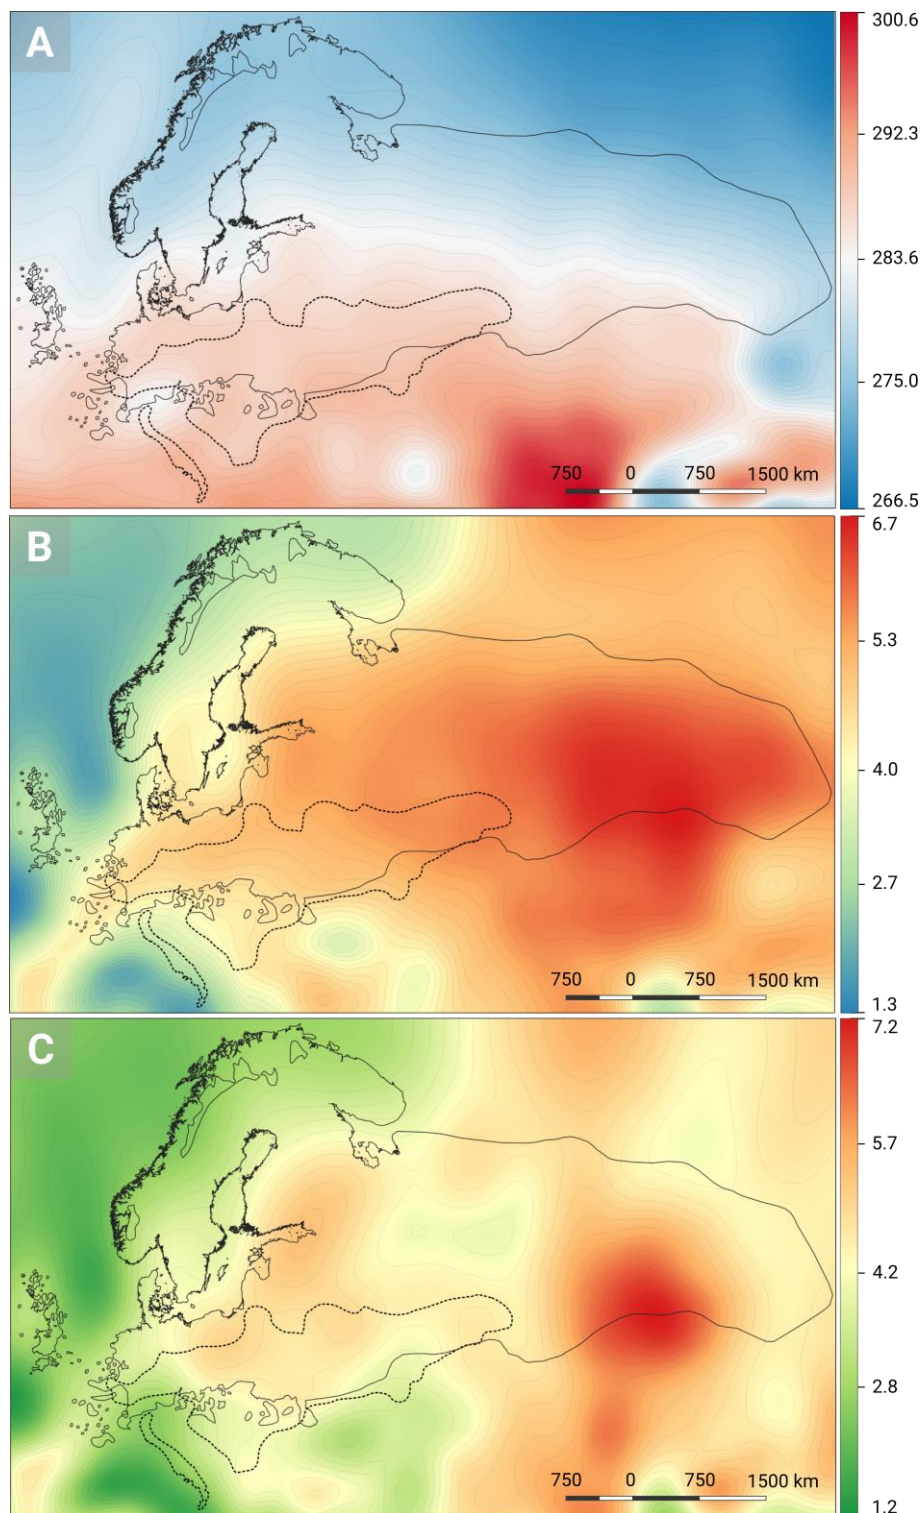

**Fig. 2. Thermal characteristics of the territories covered by the breeding ranges of the two species of *Ficedula* flycatchers.**

The images show (A) the mean daily maximum temperature in Kelvin, (B) the standard deviation of the daily maximum temperature, and (C) the standard deviation of the maximum temperature on May 1. The *F. hypoleuca* area is drawn with a solid line, the *F. albicollis* area is drawn with a dashed line. Each colour links to the value of the corresponding thermal characteristics (the key is on the right of each image). The hairlines



connect the areas with the same values of the shown characteristic (for example, in the figure **(A)** these are isotherms).

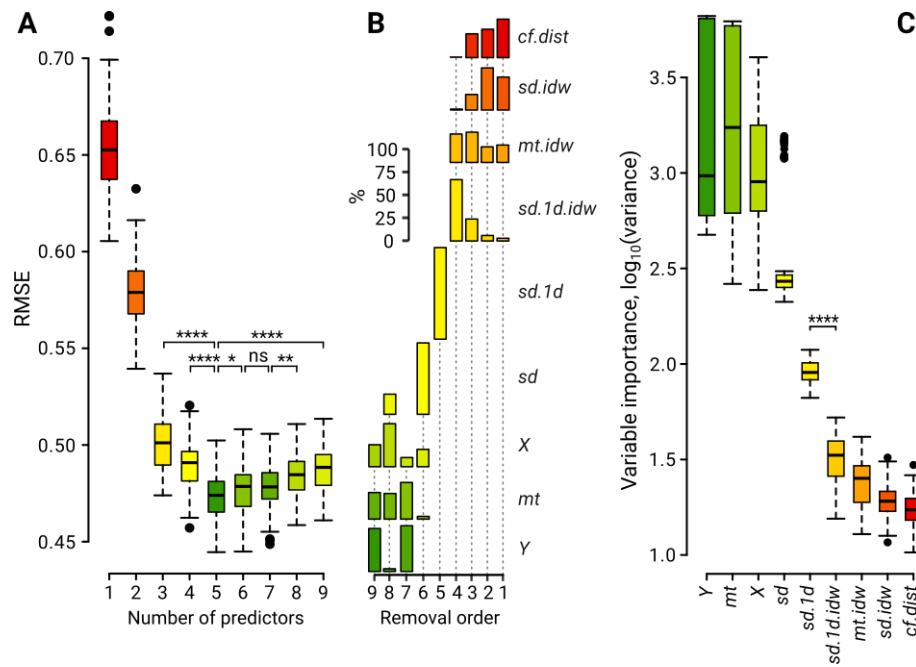

**Fig. 3. The results of the 10-fold cross-validation procedure for 100 repetitions.**

760 (A) Prediction performance of models calculated as the root mean squared error (RMSE)  
 with sequentially reduced number of predictors. (B) The removal order of predictors and its  
 frequency in percent (%), showing at what step and how often the predictors obtaining the  
 lowest variable importance value were excluded from the models. (C) The variable  
 765 importance values measured as the variance of the responses are given for all predictors  
 (the variable importance values on the ordinate axis are converted by a decimal logarithm).  
 The figure parts (A) and (C) show the median (the line across the box), the interquartile  
 range (IQR, the box), the positive and negative 1.5\*IQR extension of the IQR (the vertical  
 dotted line). The small black circles represent outliers from the latter range. A horizontal  
 line with downward serifs at the ends connects the compared values for which significance  
 770 levels of Student's t-test (two-tailed) shown as following: ns for  $p > 0.05$ ; \* for  $p < 0.05$ ; \*\*  
 for  $p < 0.01$ , and \*\*\*\* for  $p < 0.0001$ . Variable predictor names are in italics; for a  
 description, please see the material and methods.

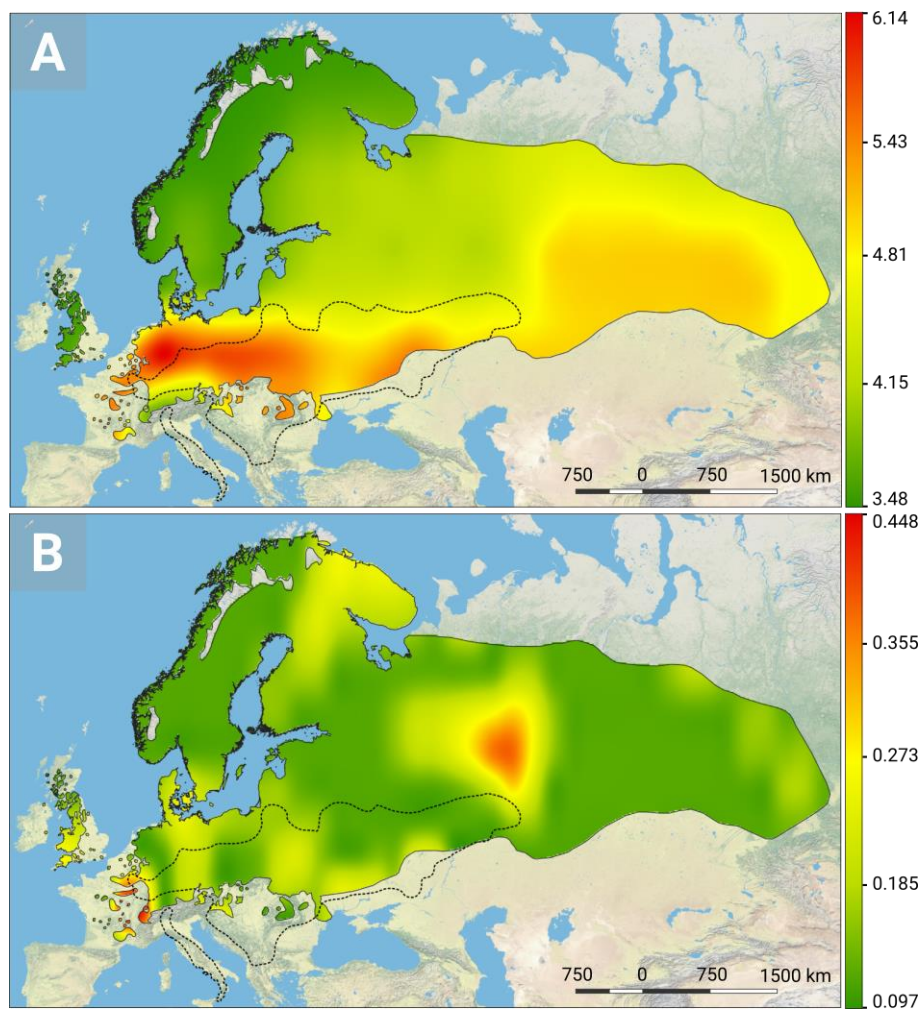

**Fig. 4. Reconstruction of the phenotypic structure of the *F. hypoleuca* populations for the entire breeding range.**

775

(A) Mean colour score predicted by the final random forest model. (B) Accuracy of the predicted values (the standard error of the predictions, see also Fig. S2). In the figure parts, the colour links to the value of the corresponding characteristic shown (the key is on the right of each part).

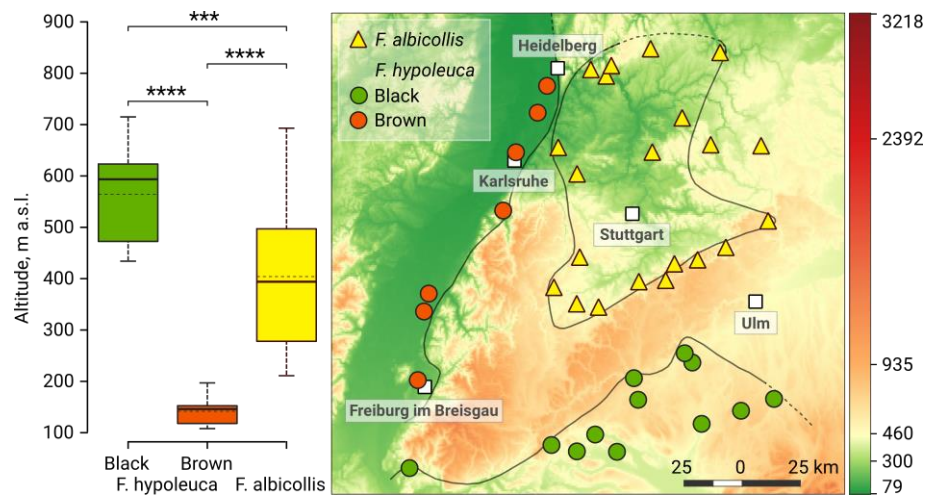

780

**Fig. 5. Small-scale spatial segregation between two species of the *Ficedula* flycatcher in south-west Germany, depending on the elevation above sea level.**

785  
790  
Reprocessed data of figure 2 (page 271) of the H. Löhrl publication in Bonner Zoologische Beiträge (Löhrl 1965) are shown. On the map, the colour indicates the height above sea level (altitude) in meters (according to the color ramp on the right of the map) and the location of the nests of the two species of *Ficedula* flycatchers. The graph compares the height of the nest locations above sea level. The graph shows the median (the solid line across the box), the mean (the dashed line across the box), the interquartile range (IQR, the box), the positive and negative 1.5\*IQR extension of the IQR (the vertical dotted line). A horizontal line with downward serifs at the ends connects the compared values for which the significance levels of Student's t-test (two-tailed) are shown as following: \*\*\* for  $p < 0.001$ , and \*\*\*\* for  $p < 0.0001$ .

## Supplementary Materials.

795

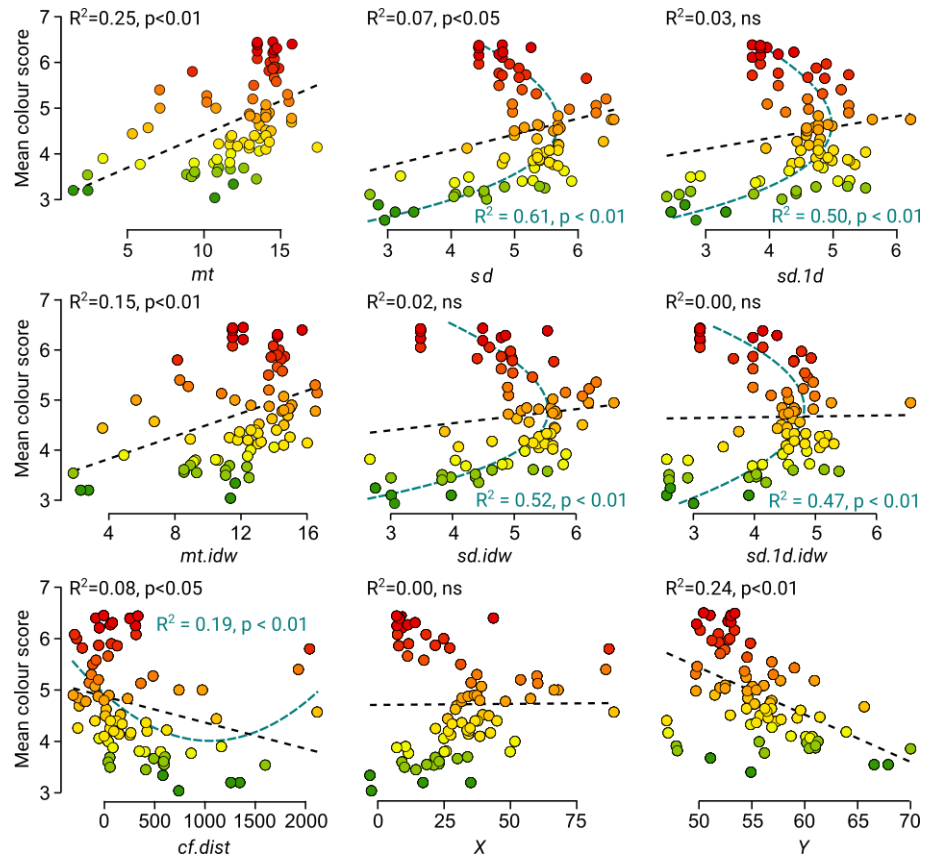

**Fig. S1. The relationship between the mean colour score (response variable) and all predictors.**

800

The scatterplots are presented for each predictor separately (the predictor name is written in italics under the x-axis), the linear (black dashed line) and non-linear (blue dashed curve) regressions are drawn; for each regression, the coefficient of determination ( $R^2$ ) and the significance level are given (indicated in black and blue font, respectively).

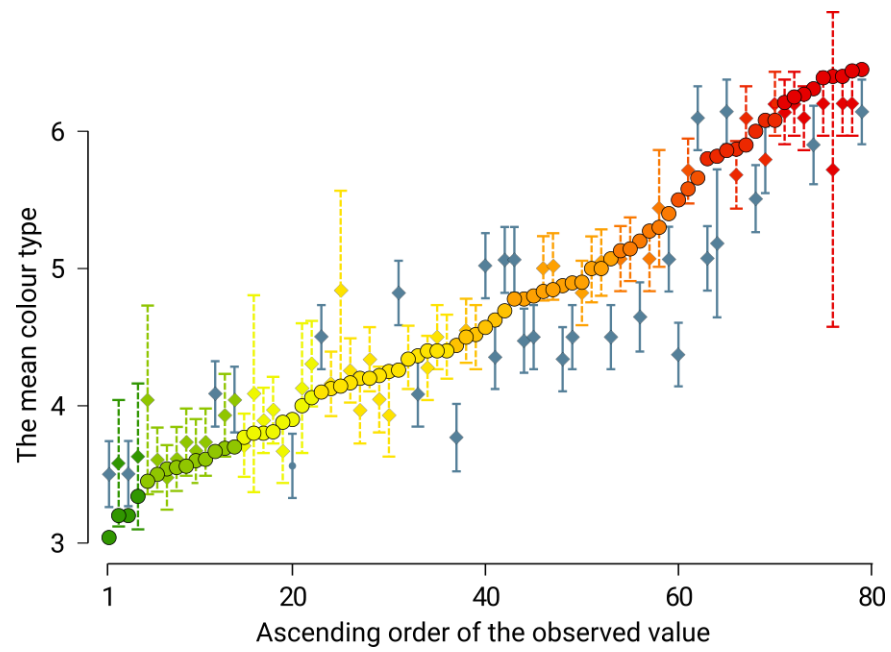

805

**Fig. S2. Comparison of observed and predicted values of mean colour score of male breeding plumage in the *F. hypoleuca* populations.**

The observed values are drawn in circles, the corresponding predicted values are drawn in diamonds; for each predicted value, a dashed vertical line indicates a 95% confidence interval (95% CI). Dark blue colour indicates such predictions that do not contain the observed value in the 95% CI.

810

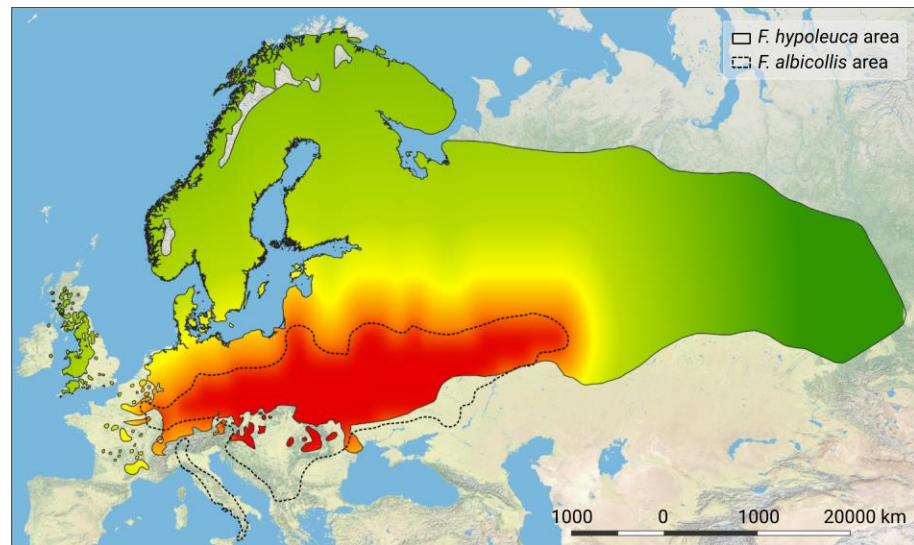

**Fig. S3. The hypothetical phenotypic structure of *F. hypoleuca* populations is drawn as if it was determined by the distance from the nesting range of *F. albicollis*.**

815

The transition from red through yellow to green corresponds to a change in the proportions of different morphs in the populations of *F. hypoleuca* from the most frequent brown through the intermediate to the most frequent black, respectively.

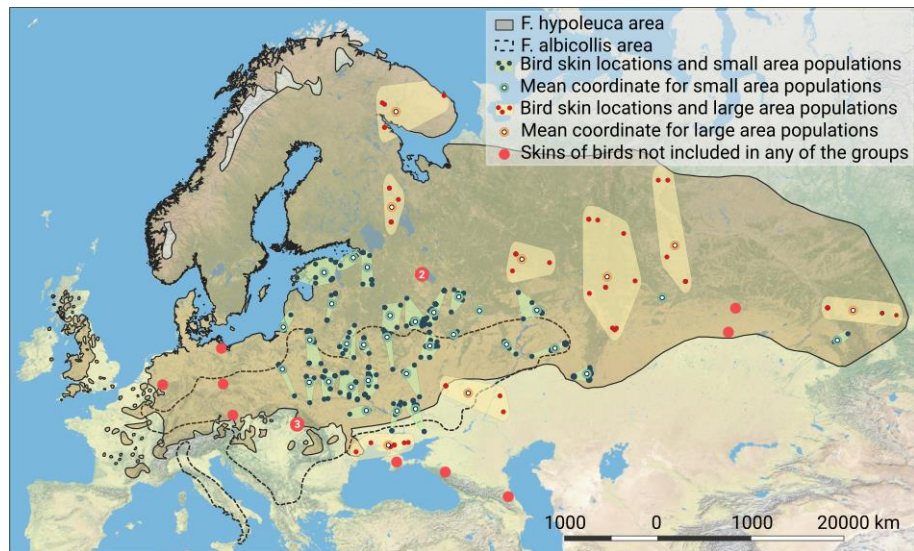

820

**Fig. S4. "Populations" formed from bird skins which were studied in 11 museums.**

The average population coordinate is the observation point used in the calculations (for summary data, please, see Table S2).



**Table S1.**

**The mean colour of males' breeding plumage in the Pied Flycatcher *Ficedula hypoleuca* populations.**

825

| #  | Longitude | Latitude | Mean colour type | Sample size | Location                                  | Country        | Source                                    |
|----|-----------|----------|------------------|-------------|-------------------------------------------|----------------|-------------------------------------------|
| 1  | 17.36     | 49.64    | 6.08             | 50          | Moravia-Jeseníky                          | Czech Republic | Laaksonen et al. 2015; Sirkia et al. 2015 |
| 2  | 24.95     | 58.15    | 3.81             | 73          | Kilingi-Nõmme                             | Estonia        | Laaksonen et al. 2015; Sirkia et al. 2015 |
| 3  | 22.16     | 60.43    | 3.56             | 408         | Ruissalo                                  | Finland        | Laaksonen et al. 2015; Sirkia et al. 2015 |
| 4  | 22.24     | 60.44    | 3.61             | 1207        | Turku                                     | Finland        | von Haartman 1985                         |
| 5  | 24.25     | 60.14    | 3.80             | 117         | Siuntio                                   | Finland        | Roskaft et al. 1986                       |
| 6  | 25.50     | 65.02    | 4.44             | 48          | Oulu                                      | Finland        | Laaksonen et al. 2015                     |
| 7  | 7.09      | 50.74    | 5.86             | 66          | Bonn                                      | Germany        | Ristow 1975                               |
| 8  | 7.29      | 52.52    | 6.40             | 416         | Lingen                                    | Germany        | Winkel and Winkel 1984                    |
| 9  | 7.32      | 52.53    | 6.39             | 806         | Lingen                                    | Germany        | Handbuch der Vögel Mitteleuropas, 1993    |
| 10 | 8.36      | 49.30    | 6.21             | 42          | Harthausen                                | Germany        | Laaksonen et al. 2015; Sirkia et al. 2015 |
| 11 | 8.51      | 49.96    | 6.45             | 49          | Mönchbruch, Hessen                        | Germany        | Trettau 1952/53                           |
| 12 | 10.43     | 51.94    | 5.66             | 44          | Goslar, Harz, Lower Saxony                | Germany        | Zang 1975                                 |
| 13 | 10.52     | 52.25    | 6.27             | 536         | Braunschweig                              | Germany        | Winkel et al. 1970                        |
| 14 | 10.78     | 52.42    | 5.90             | 1583        | Wolfsburg, Lower Saxony                   | Germany        | Sternberg et al. 2002                     |
| 15 | 13.24     | 52.49    | 6.31             | 15          | Berlin, Grunewald                         | Germany        | Curio 1959                                |
| 16 | 27.15     | 55.89    | 4.34             | 60          | Kraslava                                  | Latvia         | Laaksonen et al. 2015; Sirkia et al. 2015 |
| 17 | 9.65      | 63.33    | 3.90             | 166         | Songli                                    | Norway         | Roskaft et al. 1986                       |
| 18 | 10.75     | 59.92    | 3.77             | 72          | Oslo                                      | Norway         | Laaksonen et al. 2015; Sirkia et al. 2015 |
| 19 | 20.29     | 69.36    | 3.54             | 95          | Skibotn                                   | Norway         | Laaksonen et al. 2015; Sirkia et al. 2015 |
| 20 | 16.55     | 51.52    | 5.58             | 105         | Jemielno, Silesia                         | Poland         | Trettau and Merkel 1943                   |
| 21 | 20.83     | 55.16    | 3.69             | 459         | Courish spit                              | Russia         | Vysotsky 1995                             |
| 22 | 32.80     | 60.85    | 4.22             | 217         | Scientific field station "Mayachino"      | Russia         | Laaksonen et al. 2015; Sirkia et al. 2015 |
| 23 | 32.94     | 60.68    | 3.70             | 93          | Ladoga Ornithological Station "Gumbaricy" | Russia         | Grinkov 1997                              |
| 24 | 33.89     | 52.45    | 4.26             | 110         | Bryansky Les Nature Reserve               | Russia         | Own data                                  |
| 25 | 35.81     | 53.98    | 4.40             | NA          | Ugra National Park                        | Russia         | Vabishchevich and Formozov 2010           |
| 26 | 36.72     | 55.70    | 4.40             | 1403        | Zvenigorod                                | Russia         | Ivankina et al. 2007                      |
| 27 | 37.57     | 54.90    | 4.80             | 1631        | Moscow region                             | Russia         | Anorova 1977                              |

|    |       |       |      |      |                               |                 |                                           |
|----|-------|-------|------|------|-------------------------------|-----------------|-------------------------------------------|
| 28 | 37.60 | 54.90 | 4.10 | NA   | PTS Natural Biosphere Reserve | Russia          | Vabishchevich and Formozov 2010           |
| 29 | 59.34 | 56.49 | 5.13 | 376  | Ekaterinburg                  | Russia          | Belskii and Lyakhov 2004                  |
| 30 | 84.95 | 56.35 | 5.40 | 1770 | Tomsk                         | Russia          | Own data                                  |
| 31 | 13.55 | 55.67 | 3.45 | 54   | Vombs fure                    | Sweden          | Laaksonen et al. 2015                     |
| 32 | 16.21 | 65.95 | 3.20 | 403  | Ammarnäs                      | Sweden          | Nyholm and Myhrberg 1983                  |
| 33 | 17.63 | 59.85 | 3.55 | 408  | Uppsala                       | Sweden          | Lundberg and Alatalo 1992                 |
| 34 | 6.35  | 46.63 | 3.88 | 81   | Vaud                          | Switzerland     | Laaksonen et al. 2015; Sirkia et al. 2015 |
| 35 | 8.29  | 47.39 | 3.60 | 34   | Aagau-Zürich                  | Switzerland     | Sternberg 1964                            |
| 36 | 9.27  | 47.49 | 3.50 | 73   | Bischofszell, Thurgau         | Switzerland     | Eggenberger 1964                          |
| 37 | 6.31  | 52.88 | 6.44 | 112  | Diever - Doldersum            | The Netherlands | Bijlsma and Both 2014                     |
| 38 | 6.42  | 52.52 | 6.25 | 77   | Ommen                         | The Netherlands | Haverschmidt 1973                         |
| 39 | 6.60  | 52.86 | 6.08 | 440  | Drenthe                       | The Netherlands | Laaksonen et al. 2015; Sirkia et al. 2015 |
| 40 | -3.73 | 50.60 | 3.34 | 88   | East Dartmoor                 | United Kingdom  | Laaksonen et al. 2015; Sirkia et al. 2015 |
| 41 | -3.20 | 54.40 | 3.04 | 489  | Cumbria                       | United Kingdom  | Lundberg and Alatalo 1992                 |

**Table S2.**

830 **The observation points for "populations" formed by the bird skins from museum collections.**

835 The mean colour type for population with ID 4, indicated in square brackets, was excluded from the analysis (see the materials and methods for the explanation). The column "Populations" contains identifiers of populations, denoted as L-1, L-2, etc. for large populations and S-1, S-2, etc. for small populations, respectively (please also see Fig. S4 and Data S1).

| ID | Longitude | Latitude | Mean colour type | Standard deviation | Number of the bird skins | Populations |
|----|-----------|----------|------------------|--------------------|--------------------------|-------------|
| 1  | 33.29     | 46.49    | 4.14             | 1.46               | 7                        | L-1         |
| 2  | 42.67     | 50.55    | 6.40             | 0.89               | 5                        | L-2         |
| 3  | 34.17     | 67.26    | 3.20             | 1.10               | 5                        | L-3         |
| 4  | 33.68     | 62.50    | [2.17]           | 0.41               | 6                        | L-4         |
| 5  | 49.00     | 59.54    | 3.80             | 1.10               | 5                        | L-5         |
| 6  | 59.02     | 58.47    | 5.27             | 1.56               | 11                       | L-6         |
| 7  | 67.00     | 60.35    | 5.00             | 1.26               | 6                        | L-7         |
| 8  | 87.96     | 56.34    | 4.57             | 0.98               | 7                        | L-8         |
| 9  | 20.81     | 52.30    | 5.59             | 1.28               | 17                       | S-1         |
| 10 | 20.92     | 55.24    | 4.25             | 1.06               | 12                       | S-2         |
| 11 | 23.97     | 51.35    | 6.00             | 1.20               | 8                        | S-3         |
| 12 | 24.05     | 54.37    | 3.91             | 0.94               | 11                       | S-4         |
| 13 | 26.25     | 51.40    | 5.82             | 1.47               | 11                       | S-5         |
| 14 | 26.62     | 56.76    | 4.13             | 1.36               | 8                        | S-6         |
| 15 | 25.73     | 58.73    | 4.20             | 1.23               | 10                       | S-7         |
| 16 | 28.91     | 51.01    | 4.69             | 1.11               | 13                       | S-8         |
| 17 | 28.38     | 54.10    | 4.63             | 1.60               | 8                        | S-9         |
| 18 | 29.16     | 59.63    | 3.67             | 0.82               | 6                        | S-10        |
| 19 | 30.69     | 49.23    | 4.78             | 1.20               | 9                        | S-11        |
| 20 | 30.90     | 51.50    | 4.85             | 1.09               | 39                       | S-12        |
| 21 | 30.39     | 54.04    | 5.50             | 0.93               | 8                        | S-13        |
| 22 | 30.80     | 59.05    | 4.36             | 1.21               | 11                       | S-14        |
| 23 | 34.30     | 49.21    | 5.14             | 1.10               | 14                       | S-15        |
| 24 | 33.12     | 54.55    | 4.88             | 1.81               | 8                        | S-16        |
| 25 | 33.48     | 56.00    | 4.20             | 1.79               | 5                        | S-17        |
| 26 | 36.48     | 49.36    | 5.30             | 1.06               | 10                       | S-18        |
| 27 | 35.41     | 51.98    | 4.90             | 1.79               | 10                       | S-19        |
| 28 | 36.45     | 55.60    | 4.94             | 1.30               | 17                       | S-20        |
| 29 | 38.17     | 53.95    | 5.07             | 1.49               | 14                       | S-21        |
| 30 | 38.64     | 56.21    | 4.50             | 1.49               | 48                       | S-22        |
| 31 | 40.95     | 54.73    | 4.50             | 1.38               | 6                        | S-23        |
| 32 | 41.58     | 57.21    | 4.17             | 0.41               | 6                        | S-24        |

|    |       |       |      |      |    |      |
|----|-------|-------|------|------|----|------|
| 33 | 44.00 | 56.32 | 4.40 | 1.34 | 5  | S-25 |
| 34 | 47.18 | 54.06 | 4.78 | 1.72 | 9  | S-26 |
| 35 | 52.89 | 53.79 | 5.25 | 1.28 | 8  | S-27 |
| 36 | 50.76 | 56.36 | 4.00 | 1.63 | 13 | S-28 |
| 37 | 56.64 | 51.97 | 4.83 | 1.40 | 12 | S-29 |
| 38 | 65.50 | 57.17 | 5.00 | 1.58 | 5  | S-30 |
| 39 | 86.11 | 54.34 | 5.80 | 1.30 | 5  | S-31 |

840

**Data S1. The list of bird skins stored in museum collections and used to calculate the mean breeding plumage color score of males in the Pied Flycatcher populations.**

| Row ID | Bird skin ID | Colour type | Latitude.S-N | Longitude.W-E | Population ID | Museum | Location (transliterated)                          | Location (translated)                                  |
|--------|--------------|-------------|--------------|---------------|---------------|--------|----------------------------------------------------|--------------------------------------------------------|
| 1      | R-11766      | 2           | 53.849       | 13.694        | N/A           | 7      | Anklam, Pomeraniya                                 | Anklam, Pomerania                                      |
| 2      | R-109136     | 5           | 52.431       | 56.991        | S-29          | 7      | YUzhnyj Ural, verhov'ya reki Malaya Suren'         | Southern Ural, upper reaches of the Malaya Suren river |
| 3      | R-109144     | 3           | 52.001       | 57.034        | S-29          | 7      | YUzhnyj Ural, Kasmarka                             | South Ural, Kasmark                                    |
| 4      | R-109135     | 5           | 52.001       | 57.034        | S-29          | 7      | YUzhnyj Ural, Kasmarka                             | South Ural, Kasmark                                    |
| 5      | R-109145     | 3           | 52.001       | 57.034        | S-29          | 7      | YUzhnyj Ural, Kasmarka                             | South Ural, Kasmark                                    |
| 6      | R-29249      | 4           | 54.108       | 54.122        | S-27          | 7      | Belebejskij rajon                                  | Belebey district                                       |
| 7      | R-109142     | 6           | 54.108       | 54.122        | S-27          | 7      | Belebejskij rajon                                  | Belebey district                                       |
| 8      | R-107465     | 5           | 61.038       | 60.973        | L-6           | 7      | Verhov'ya reki Malaya Sos'va                       | The upper river Malaya Sosva                           |
| 9      | R-50644      | 6           | 61.794       | 57.923        | L-6           | 7      | Verhov'ya Pechory                                  | Upper Pechora                                          |
| 10     | R-83501      | 4           | 56.235       | 40.681        | S-24          | 7      | Vladimirskaaya oblast', selo Nesterkovo            | Vladimir region, village Nesterkovo                    |
| 11     | R-60274      | 6           | 58.219       | 62.315        | L-6           | 7      | Ekaterinburgskaya oblast'                          | Yekaterinburg region                                   |
| 12     | R-13750      | 4           | 57.012       | 42.003        | S-24          | 7      | Ivanovskaya oblast'                                | Ivanovo region                                         |
| 13     | R-51815      | 4           | 59.673       | 66.055        | L-7           | 7      | Irtysh, verhov'ya reki Kondy, ozero Orditur (?)    | Irtys, headwaters of the river Konda, Orditur lake (?) |
| 14     | R-40007      | 3           | 58.669       | 37.275        | N/A           | 7      | Kalininskaya oblast', Ves'egonskij rajon           | Kalinin region, Vesjegonsky district                   |
| 15     | R-40006      | 2           | 58.669       | 37.275        | N/A           | 7      | Kalininskaya oblast', Ves'egonskij rajon           | Kalinin region, Vesjegonsky district                   |
| 16     | R-40008      | 6           | 57.123       | 35.466        | S-20          | 7      | Kalininskaya oblast', Lihoslavskij rajon           | Kalinin region, Likhoslav district                     |
| 17     | R-88770      | 2           | 63.523       | 33.402        | L-4           | 7      | Kareliya                                           | Karelia                                                |
| 18     | R-88769      | 2           | 63.523       | 33.402        | L-4           | 7      | Kareliya                                           | Karelia                                                |
| 19     | R-89750      | 5           | 54.788       | 87.356        | S-31          | 7      | Kemerovskaya oblast', Pron'evskij rajon            | Kemerovo region, Pronevsky district                    |
| 20     | R-11737      | 4           | 57.452       | 41.499        | S-24          | 7      | Kostromskaya oblast', Plyos                        | Kostroma region, Plyos                                 |
| 21     | R-97950      | 5           | 56.163       | 91.389        | L-8           | 7      | Krasnoyarskij kraj, Kozul'skij rajon               | Krasnoyarsk Territory, Kozulsky District               |
| 22     | R-41100      | 4           | 67.661       | 32.561        | L-3           | 7      | Laplanskiy zapovednik                              | Lapland Reserve                                        |
| 23     | 7554         | 4           | 66.538       | 32.823        | L-3           | 4      | Louhskij rajon, CHyornaya rechka                   | Loukhsky district, Black River                         |
| 24     | N/A          | 2           | 66.538       | 32.823        | L-3           | 4      | Louhskij rajon, CHyornaya rechka                   | Loukhsky district, Black River                         |
| 25     | R-89460      | 4           | 55.727       | 36.212        | S-20          | 7      | Moskovskaya oblast', Arhangel'skoe                 | Moscow region, Arkhangelsk                             |
| 26     | R-75466      | 7           | 55.741       | 36.501        | S-20          | 7      | Moskovskaya oblast', Gluboko-Istrinskij zapovednik | Moscow region, Gluboko-Istrinsky reserve               |
| 27     | R-36697      | 2           | 56.315       | 38.132        | S-22          | 7      | Moskovskaya oblast', Zagorskij rajon               | Moscow region, Zagorsky district                       |
| 28     | R-117099     | 3           | 55.865       | 37.836        | S-22          | 7      | Moskovskaya oblast', Losinyj ostrov                | Moscow region, Losiny island                           |
| 29     | R-60277      | 4           | 55.495       | 36.039        | S-20          | 7      | Moskovskaya oblast', Mozhajskij rajon              | Moscow region, Mozhaisky district                      |
| 30     | R-6028       | 3           | 55.495       | 36.039        | S-20          | 7      | Moskovskaya oblast', Mozhajskij rajon              | Moscow region, Mozhaisky district                      |
| 31     | R-83497      | 4           | 55.495       | 36.039        | S-20          | 7      | Moskovskaya oblast', Mozhajskij rajon              | Moscow region, Mozhaisky district                      |
| 32     | R-83498      | 4           | 55.495       | 36.039        | S-20          | 7      | Moskovskaya oblast', Mozhajskij rajon              | Moscow region, Mozhaisky district                      |
| 33     | R-83500      | 4           | 55.495       | 36.039        | S-20          | 7      | Moskovskaya oblast', Mozhajskij rajon              | Moscow region, Mozhaisky district                      |
| 34     | R-83495      | 6           | 55.495       | 36.039        | S-20          | 7      | Moskovskaya oblast', Mozhajskij rajon              | Moscow region, Mozhaisky district                      |
| 35     | R-83496      | 7           | 55.495       | 36.039        | S-20          | 7      | Moskovskaya oblast', Mozhajskij rajon              | Moscow region, Mozhaisky district                      |
| 36     | R-83499      | 5           | 55.495       | 36.039        | S-20          | 7      | Moskovskaya oblast', Mozhajskij rajon              | Moscow region, Mozhaisky district                      |

|    |          |   |        |        |      |   |                                                     |                                                 |
|----|----------|---|--------|--------|------|---|-----------------------------------------------------|-------------------------------------------------|
| 37 | R-117088 | 5 | 55.536 | 37.066 | S-20 | 7 | Moskovskaya oblast', Narofominskij rajon, Aprelevka | Moscow region, Narofominsky district, Aprelevka |
| 38 | R-117092 | 4 | 55.536 | 37.066 | S-20 | 7 | Moskovskaya oblast', Narofominskij rajon, Aprelevka | Moscow region, Narofominsky district, Aprelevka |
| 39 | R-60216  | 5 | 55.861 | 38.783 | S-22 | 7 | Moskovskaya oblast', Noginskij rajon                | Moscow region, Noginsk district                 |
| 40 | R-60234  | 4 | 55.861 | 38.783 | S-22 | 7 | Moskovskaya oblast', Noginskij rajon                | Moscow region, Noginsk district                 |
| 41 | R-60212  | 6 | 55.861 | 38.783 | S-22 | 7 | Moskovskaya oblast', Noginskij rajon                | Moscow region, Noginsk district                 |
| 42 | R-?      | 6 | 55.861 | 38.783 | S-22 | 7 | Moskovskaya oblast', Noginskij rajon                | Moscow region, Noginsk district                 |
| 43 | R-60226  | 4 | 55.861 | 38.783 | S-22 | 7 | Moskovskaya oblast', Noginskij rajon                | Moscow region, Noginsk district                 |
| 44 | R-60218  | 5 | 55.861 | 38.783 | S-22 | 7 | Moskovskaya oblast', Noginskij rajon                | Moscow region, Noginsk district                 |
| 45 | R-60235  | 7 | 55.861 | 38.783 | S-22 | 7 | Moskovskaya oblast', Noginskij rajon                | Moscow region, Noginsk district                 |
| 46 | R-60239  | 5 | 55.861 | 38.783 | S-22 | 7 | Moskovskaya oblast', Noginskij rajon                | Moscow region, Noginsk district                 |
| 47 | R-60232  | 6 | 55.861 | 38.783 | S-22 | 7 | Moskovskaya oblast', Noginskij rajon                | Moscow region, Noginsk district                 |
| 48 | R-60227  | 3 | 55.861 | 38.783 | S-22 | 7 | Moskovskaya oblast', Noginskij rajon                | Moscow region, Noginsk district                 |
| 49 | R-60221  | 3 | 55.861 | 38.783 | S-22 | 7 | Moskovskaya oblast', Noginskij rajon                | Moscow region, Noginsk district                 |
| 50 | R-60217  | 3 | 55.861 | 38.783 | S-22 | 7 | Moskovskaya oblast', Noginskij rajon                | Moscow region, Noginsk district                 |
| 51 | R-60229  | 5 | 55.861 | 38.783 | S-22 | 7 | Moskovskaya oblast', Noginskij rajon                | Moscow region, Noginsk district                 |
| 52 | R-60233  | 4 | 55.861 | 38.783 | S-22 | 7 | Moskovskaya oblast', Noginskij rajon                | Moscow region, Noginsk district                 |
| 53 | R-60238  | 4 | 55.861 | 38.783 | S-22 | 7 | Moskovskaya oblast', Noginskij rajon                | Moscow region, Noginsk district                 |
| 54 | R-60213  | 4 | 55.861 | 38.783 | S-22 | 7 | Moskovskaya oblast', Noginskij rajon                | Moscow region, Noginsk district                 |
| 55 | R-60236  | 3 | 55.861 | 38.783 | S-22 | 7 | Moskovskaya oblast', Noginskij rajon                | Moscow region, Noginsk district                 |
| 56 | R-60219  | 2 | 55.861 | 38.783 | S-22 | 7 | Moskovskaya oblast', Noginskij rajon                | Moscow region, Noginsk district                 |
| 57 | R-60211  | 4 | 55.861 | 38.783 | S-22 | 7 | Moskovskaya oblast', Noginskij rajon                | Moscow region, Noginsk district                 |
| 58 | R-60222  | 7 | 55.861 | 38.783 | S-22 | 7 | Moskovskaya oblast', Noginskij rajon                | Moscow region, Noginsk district                 |
| 59 | R-68209  | 2 | 55.861 | 38.783 | S-22 | 7 | Moskovskaya oblast', Noginskij rajon                | Moscow region, Noginsk district                 |
| 60 | R-60224  | 3 | 55.861 | 38.783 | S-22 | 7 | Moskovskaya oblast', Noginskij rajon                | Moscow region, Noginsk district                 |
| 61 | R-11736  | 3 | 55.438 | 37.565 | S-22 | 7 | Moskovskaya oblast', Podol'skij rajon               | Moscow region, Podolsky district                |
| 62 | R-11726  | 6 | 55.438 | 37.565 | S-22 | 7 | Moskovskaya oblast', Podol'skij rajon               | Moscow region, Podolsky district                |
| 63 | R-11734  | 4 | 55.438 | 37.565 | S-22 | 7 | Moskovskaya oblast', Podol'skij rajon               | Moscow region, Podolsky district                |
| 64 | R-11725  | 4 | 55.438 | 37.565 | S-22 | 7 | Moskovskaya oblast', Podol'skij rajon               | Moscow region, Podolsky district                |
| 65 | R-109820 | 7 | 55.503 | 37.305 | S-20 | 7 | Moskovskaya oblast', reka Desna                     | Moscow region, Desna river                      |
| 66 | R-109817 | 4 | 55.503 | 37.305 | S-20 | 7 | Moskovskaya oblast', reka Desna                     | Moscow region, Desna river                      |
| 67 | R-109819 | 6 | 55.772 | 37.432 | S-20 | 7 | Moskovskaya oblast', Serebryanyj bor                | Moscow region, Serebryanny Bor                  |
| 68 | R-117096 | 5 | 54.889 | 38.114 | S-21 | 7 | Moskovskaya oblast', Stupinskij rajon               | Moscow region, Stupinsky district               |
| 69 | R-117095 | 6 | 54.889 | 38.114 | S-21 | 7 | Moskovskaya oblast', Stupinskij rajon               | Moscow region, Stupinsky district               |
| 70 | R-11733  | 4 | 57.421 | 27.055 | S-6  | 7 | Marienburg, Lifyandiya                              | Marienburg, Livonia                             |
| 71 | R-11731  | 2 | 57.421 | 27.055 | S-6  | 7 | Marienburg, Lifyandiya                              | Marienburg, Livonia                             |
| 72 | R-11727  | 6 | 57.421 | 27.055 | S-6  | 7 | Marienburg, Lifyandiya                              | Marienburg, Livonia                             |
| 73 | R-11751  | 4 | 57.421 | 27.055 | S-6  | 7 | Marienburg, Lifyandiya                              | Marienburg, Livonia                             |
| 74 | R-93065  | 4 | 53.901 | 27.557 | S-9  | 7 | Minskaya oblast'ast'                                | Minsk region                                    |
| 75 | R-60241  | 4 | 55.752 | 37.614 | S-22 | 7 | Moskva                                              | Moscow                                          |
| 76 | R-60207  | 4 | 55.752 | 37.614 | S-22 | 7 | Moskva                                              | Moscow                                          |
| 77 | R-60242  | 4 | 55.752 | 37.614 | S-22 | 7 | Moskva                                              | Moscow                                          |
| 78 | R-11739  | 6 | 55.752 | 37.614 | S-22 | 7 | Moskva                                              | Moscow                                          |

|     |           |   |        |        |      |   |                                                                  |                                                                   |
|-----|-----------|---|--------|--------|------|---|------------------------------------------------------------------|-------------------------------------------------------------------|
| 79  | R-116590  | 7 | 55.752 | 37.614 | S-22 | 7 | Moskva                                                           | Moscow                                                            |
| 80  | R-117087  | 4 | 55.752 | 37.614 | S-22 | 7 | Moskva                                                           | Moscow                                                            |
| 81  | R-60260   | 3 | 56.741 | 38.852 | S-22 | 7 | Pereslavl'-Zaleskij                                              | Pereslavl-Zalesky                                                 |
| 82  | R-60261   | 7 | 56.741 | 38.852 | S-22 | 7 | Pereslavl'-Zaleskij                                              | Pereslavl-Zalesky                                                 |
| 83  | R-60204   | 4 | 56.741 | 38.852 | S-22 | 7 | Pereslavskij rajon                                               | Pereslavsky district                                              |
| 84  | R-60259   | 2 | 56.741 | 38.852 | S-22 | 7 | Pereslavskij rajon                                               | Pereslavsky district                                              |
| 85  | R-60205   | 5 | 56.741 | 38.852 | S-22 | 7 | Pereslavskij rajon                                               | Pereslavsky district                                              |
| 86  | R-60273   | 3 | 61.838 | 56.864 | L-6  | 7 | Pechorskij zapovednik (poselok Ilychskij?)                       | Pechora Nature Reserve (Ilychsky village?)                        |
| 87  | R-50636   | 4 | 61.838 | 56.864 | L-6  | 7 | Pechora, dolina reki Ul'n                                        | Pechora, Uln River Valley                                         |
| 88  | R-35771   | 3 | 55.174 | 59.654 | L-6  | 7 | reka Malyj Syrostan, u Zlatousta                                 | Maly Syrostan river, near Chrysostom                              |
| 89  | R-65543   | 4 | 54.834 | 40.915 | S-23 | 7 | Ryazanskaya oblast', Bel'kovskij rajon, selo Aluhtinskie dvoriki | Ryazan region, Belkovsky district, village Alukhtinsky courtyards |
| 90  | R-60262   | 3 | 54.541 | 40.859 | S-23 | 7 | Ryazanskaya oblast', Izhevskij rajon                             | Ryazan region, Izhevsky district                                  |
| 91  | R-11741   | 3 | 54.236 | 39.011 | S-21 | 7 | Ryazanskaya oblast'ast'. Mihalovskij rajon                       | Ryazan region Michalovsky district                                |
| 92  | R-29254   | 7 | 54.231 | 85.803 | S-31 | 7 | Salair, verhov'ya reki CHulysh                                   | Salair, the upper reaches of the river Chulysh                    |
| 93  | R-29255   | 7 | 54.231 | 85.803 | S-31 | 7 | Salair, verhov'ya reki CHulysh                                   | Salair, the upper reaches of the river Chulysh                    |
| 94  | R-29247   | 4 | 54.231 | 85.803 | S-31 | 7 | Salair, reka Syuhta                                              | Salair, Syukhta River                                             |
| 95  | R-29256   | 6 | 54.231 | 85.803 | S-31 | 7 | Salair, reka Syuhta                                              | Salair, Syukhta River                                             |
| 96  | R-29245   | 4 | 56.508 | 84.973 | L-8  | 7 | Tomsk                                                            | Tomsk                                                             |
| 97  | R-29246   | 5 | 56.508 | 84.973 | L-8  | 7 | Tomsk                                                            | Tomsk                                                             |
| 98  | R-29252   | 6 | 57.167 | 65.501 | S-30 | 7 | Tyumen'                                                          | Tyumen                                                            |
| 99  | R-30168   | 4 | 57.167 | 65.501 | S-30 | 7 | Tyumen'                                                          | Tyumen                                                            |
| 100 | R-29251   | 7 | 57.167 | 65.501 | S-30 | 7 | Tyumen'                                                          | Tyumen                                                            |
| 101 | R-93314   | 5 | 63.934 | 66.161 | L-7  | 7 | Hantymansijskij nacional'nyj okrug, Nizhnaya Ob'                 | Khanty-Mansi National District, Lower Ob                          |
| 102 | R-70519   | 4 | 56.531 | 32.861 | S-17 | 7 | Central'nyj lesnoj gosudarstvennyj zapovednik                    | Central Forest State Reserve                                      |
| 103 | R-70517   | 2 | 56.531 | 32.861 | S-17 | 7 | Central'nyj lesnoj gosudarstvennyj zapovednik                    | Central Forest State Reserve                                      |
| 104 | 21358     | 7 | 49.132 | 46.819 | L-2  | 3 | Ehl'ton                                                          | Elton                                                             |
| 105 | R-15996   | 6 | 52.297 | 56.997 | S-29 | 7 | YUzhnyj Ural                                                     | Southern Urals                                                    |
| 106 | R-35772   | 3 | 52.297 | 56.997 | S-29 | 7 | YUzhnyj Ural, Aleksandrovka                                      | South Ural, Aleksandrovka                                         |
| 107 | R-109146  | 4 | 52.001 | 57.034 | S-29 | 7 | YUzhnyj Ural, verhov'ya reki Kasmarka                            | South Ural, headwaters of the Kasmark                             |
| 108 | R-15994   | 4 | 51.551 | 56.915 | S-29 | 7 | YUzhnyj Ural, Ziyanchurinskij rajon                              | South Ural, Zianchurinsky District                                |
| 109 | R-15993   | 6 | 51.551 | 56.915 | S-29 | 7 | YUzhnyj Ural, Ziyanchurinskij rajon                              | South Ural, Zianchurinsky District                                |
| 110 | R-35773   | 7 | 55.166 | 60.118 | L-6  | 7 | YUzhnyj Ural, Turgoyak                                           | South Ural, Turgoyak                                              |
| 111 | R-48062   | 4 | 57.607 | 39.858 | S-22 | 7 | YAroslavskaya oblast'                                            | Yaroslavskaya oblast                                              |
| 112 | R-60271   | 4 | 57.607 | 39.858 | S-22 | 7 | YAroslavskaya oblast'                                            | Yaroslavskaya oblast                                              |
| 113 | R-60256   | 6 | 57.607 | 39.858 | S-22 | 7 | YAroslavskaya oblast'                                            | Yaroslavskaya oblast                                              |
| 114 | R-60206   | 7 | 56.769 | 38.761 | S-22 | 7 | YAroslavskaya oblast', Pleshcheevo                               | Yaroslavl region, Plescheevo                                      |
| 115 | 1462.188  | 4 | 54.533 | 28.531 | S-9  | 6 | Belorussiya, Minskaya oblast'ast', Kletnoe                       | Belarus, Minsk region, Kletnoe                                    |
| 116 | 1455/639  | 6 | 53.834 | 30.233 | S-13 | 6 | Belorussiya, Mogilyovsk, Selec                                   | Belarus, Mogilevsk, Selets                                        |
| 117 | 1452/1775 | 6 | 53.442 | 31.005 | S-13 | 6 | Belorussiya, Propojsk, CHizhenka                                 | Belarus, Propoisk, Chizhenka                                      |
| 118 | 1454\815  | 6 | 55.355 | 29.299 | S-9  | 6 | Belorussiya, Vitebskaya oblast'ast' Obol'                        | Belarus, Vitebsk region Obol                                      |
| 119 | 1456\532  | 7 | 53.834 | 30.233 | S-13 | 6 | Belorussiya, Mogilyovsk, YUr'ev                                  | Belarus, Mogilevsk, Yuryevo                                       |
| 120 | N/A       | 4 | 53.834 | 30.233 | S-13 | 6 | Belorussiya, Mogilyovsk, YUr'ev                                  | Belarus, Mogilevsk, Yuryevo                                       |

|     |          |   |        |        |      |   |                                                              |                                                  |
|-----|----------|---|--------|--------|------|---|--------------------------------------------------------------|--------------------------------------------------|
| 121 | 1458\601 | 6 | 53.834 | 30.233 | S-13 | 6 | Belorussiya, Mogilyovsk,                                     | Belarus, Mogilevsk,                              |
| 122 | 1463\35  | 4 | 53.417 | 27.918 | S-9  | 6 | Belorussiya, Minskaya oblast'ast', Igumenskij rajon, Gorelec | Belarus, Minsk region, Igumen district, Gorelets |
| 123 | 1457\458 | 7 | 53.701 | 28.249 | S-9  | 6 | Belorussiya, Minskaya oblast'ast', Igumenskij rajon          | Belarus, Minsk region, Igumen district           |
| 124 | 1472\731 | 4 | 54.889 | 28.698 | S-9  | 6 | Belorussiya, Lepel'skij rajon                                | Belarus, Lepel district                          |
| 125 | 1385     | 5 | 54.502 | 30.405 | S-13 | 6 | Vitebskaya oblast', Orshanskij rajon                         | Vitebsk region, Orsha district                   |
| 126 | 1391     | 2 | 53.901 | 27.557 | S-9  | 6 | Minskaya oblast'ast', Belopol'sk rajon                       | Minsk region, Belopolsk district                 |
| 127 | N/A      | 7 | 50.351 | 46.416 | L-2  | 9 | Volgogradskaya oblast'ast', Valuevka                         | Volgograd region, Valuevka                       |
| 128 | 1380     | 5 | 54.502 | 30.405 | S-13 | 6 | Vitebskaya oblast', Orshanskij rajon                         | Vitebsk region, Orsha district                   |
| 129 | N/A      | 5 | 54.502 | 30.405 | S-13 | 6 | Vitebskaya oblast', Orshanskij rajon                         | Vitebsk region, Orsha district                   |
| 130 | A5748    | 4 | 56.163 | 91.389 | L-8  | 2 | Krasnoyarskij kraj, Kozul'skij rajon                         | Krasnoyarsk Territory, Kozulsky District         |
| 131 | A5745    | 6 | 54.697 | 40.849 | S-23 | 2 | Okskij zapovednikk                                           | Oksky Reserve                                    |
| 132 | A5746    | 5 | 54.697 | 40.849 | S-23 | 2 | Okskij zapovednikk                                           | Oksky Reserve                                    |
| 133 | A5747    | 3 | 54.697 | 40.849 | S-23 | 2 | Okskij zapovednikk                                           | Oksky Reserve                                    |
| 134 | N/A      | 4 | 55.162 | 20.837 | S-2  | 9 | Kurshskaya kosa                                              | Curonian Spit                                    |
| 135 | N/A      | 5 | 55.162 | 20.837 | S-2  | 9 | Kurshskaya kosa                                              | Curonian Spit                                    |
| 136 | N/A      | 4 | 55.162 | 20.837 | S-2  | 9 | Kurshskaya kosa                                              | Curonian Spit                                    |
| 137 | N/A      | 5 | 55.162 | 20.837 | S-2  | 9 | Kurshskaya kosa                                              | Curonian Spit                                    |
| 138 | N/A      | 2 | 62.917 | 34.455 | L-4  | 9 | Kareliya, Medvezh'ya gora                                    | Karelia, Bear Mountain                           |
| 139 | N/A      | 6 | 55.162 | 20.837 | S-2  | 9 | Kurshskaya kosa                                              | Curonian Spit                                    |
| 140 | N/A      | 5 | 55.162 | 20.837 | S-2  | 9 | Kurshskaya kosa                                              | Curonian Spit                                    |
| 141 | N/A      | 3 | 55.162 | 20.837 | S-2  | 9 | Kurshskaya kosa                                              | Curonian Spit                                    |
| 142 | N/A      | 4 | 55.162 | 20.837 | S-2  | 9 | Kurshskaya kosa                                              | Curonian Spit                                    |
| 143 | N/A      | 5 | 55.162 | 20.837 | S-2  | 9 | Kurshskaya kosa                                              | Curonian Spit                                    |
| 144 | N/A      | 2 | 55.162 | 20.837 | S-2  | 9 | Kurshskaya kosa                                              | Curonian Spit                                    |
| 145 | N/A      | 4 | 55.162 | 20.837 | S-2  | 9 | Kurshskaya kosa                                              | Curonian Spit                                    |
| 146 | N/A      | 4 | 59.717 | 29.464 | S-10 | 9 | Leningradskaya oblast'ast', Novaya burya                     | Leningrad region, New Storm                      |
| 147 | N/A      | 3 | 59.934 | 30.319 | S-14 | 9 | Sankt-Peterburg                                              | St. Petersburg                                   |
| 148 | N/A      | 3 | 59.934 | 30.319 | S-14 | 9 | Sankt-Peterburg                                              | St. Petersburg                                   |
| 149 | N/A      | 4 | 59.717 | 29.464 | S-10 | 9 | Leningradskaya oblast'ast', Novaya burya                     | Leningrad region, New Storm                      |
| 150 | N/A      | 4 | 59.717 | 29.464 | S-10 | 9 | Leningradskaya oblast'ast', Novaya burya                     | Leningrad region, New Storm                      |
| 151 | N/A      | 2 | 59.717 | 29.464 | S-10 | 9 | Leningradskaya oblast'ast', Novaya burya                     | Leningrad region, New Storm                      |
| 152 | N/A      | 4 | 59.717 | 29.464 | S-10 | 9 | Leningradskaya oblast'ast', Novaya burya                     | Leningrad region, New Storm                      |
| 153 | N/A      | 5 | 59.934 | 30.319 | S-14 | 9 | Sankt-Peterburg                                              | St. Petersburg                                   |
| 154 | N/A      | 4 | 57.667 | 41.031 | S-24 | 9 | Kostromskaya oblast', YU'evckij rajon                        | Kostroma region, Yuryevets district              |
| 155 | N/A      | 4 | 57.452 | 42.125 | S-24 | 9 | Ivanovskaya oblast'ast', Kineshnyj rajon                     | Ivanovo region, Kineshny district                |
| 156 | N/A      | 4 | 67.591 | 32.833 | L-3  | 9 | Kol'skij poluostrov, ozero Imandra                           | Kola Peninsula, Imandra Lake                     |
| 157 | N/A      | 3 | 61.686 | 33.614 | L-4  | 9 | Kareliya, Pryazhinskij rajon                                 | Karelia, Pryazha district                        |
| 158 | N/A      | 4 | 59.934 | 30.319 | S-14 | 9 | Sankt-Peterburg                                              | St. Petersburg                                   |
| 159 | N/A      | 2 | 61.686 | 33.614 | L-4  | 9 | Kareliya, Pryazhinskij rajon                                 | Karelia, Pryazha district                        |
| 160 | N/A      | 2 | 61.686 | 33.614 | L-4  | 9 | Kareliya, Pryazhinskij rajon                                 | Karelia, Pryazha district                        |
| 161 | N/A      | 5 | 55.752 | 37.614 | S-22 | 9 | Moskva                                                       | Moscow                                           |
| 162 | N/A      | 4 | 55.752 | 37.614 | S-22 | 9 | Moskva                                                       | Moscow                                           |



|     |       |   |        |        |      |    |                                                |                                         |
|-----|-------|---|--------|--------|------|----|------------------------------------------------|-----------------------------------------|
| 163 | N/A   | 4 | 57.819 | 58.843 | L-6  | 9  | Permskaya oblast'ast', reka Serebryanka        | Perm Region, Serebryanka River          |
| 164 | N/A   | 4 | 59.151 | 30.833 | S-14 | 9  | Leningradskaya oblast'ast', Dubovik            | Leningrad region, Dubovik               |
| 165 | N/A   | 5 | 57.452 | 42.125 | S-24 | 9  | Ivanovskaya oblast'ast', Kineshnyj rajon       | Ivanovo region, Kineshny district       |
| 166 | N/A   | 6 | 54.933 | 41.401 | S-23 | 9  | Ryazanskaya oblast'ast', Kasimovskij rajon     | Ryazan region, Kasimov district         |
| 167 | N/A   | 3 | 59.756 | 31.072 | S-14 | 9  | Leningradskaya oblast'ast', Mihajlovskij rajon | Leningrad region, Mikhailovsky district |
| 168 | N/A   | 6 | 58.017 | 30.283 | S-14 | 9  | Novgorodskaya, oblast', Velesh                 | Novgorod region, Veles                  |
| 169 | N/A   | 2 | 67.976 | 39.831 | L-3  | 9  | Murmanskaya oblast', lokanga                   | Murmansk region, lokanga                |
| 170 | A5743 | 5 | 56.317 | 44.001 | S-25 | 2  | Nizhnij Novgorod                               | Nizhny Novgorod                         |
| 171 | A5741 | 3 | 56.317 | 44.001 | S-25 | 2  | Nizhnij Novgorod                               | Nizhny Novgorod                         |
| 172 | A5742 | 6 | 56.317 | 44.001 | S-25 | 2  | Nizhnij Novgorod                               | Nizhny Novgorod                         |
| 173 | N/A   | 5 | 56.317 | 44.001 | S-25 | 9  | Nizhnij Novgorod                               | Nizhny Novgorod                         |
| 174 | N/A   | 3 | 56.317 | 44.001 | S-25 | 9  | Nizhnij Novgorod                               | Nizhny Novgorod                         |
| 175 | N/A   | 6 | 57.997 | 31.361 | S-14 | 9  | Novgorskaya oblast', Starorussk rajon          | Novgorod region, Starorussky district   |
| 176 | N/A   | 7 | 57.819 | 58.843 | L-6  | 9  | Permskaya oblast'ast', reka Serebryanka        | Perm Region, Serebryanka River          |
| 177 | N/A   | 6 | 56.682 | 34.715 | S-17 | 9  | Tverskaya oblast', Bernovo                     | Tver region, Bernovo                    |
| 178 | N/A   | 6 | 57.436 | 56.942 | L-6  | 9  | permsk. oblast'ast' kungur                     | Perm. area kungur                       |
| 179 | N/A   | 7 | 51.782 | 55.107 | S-29 | 9  | Orenburg                                       | Orenburg                                |
| 180 | N/A   | 6 | 54.975 | 73.382 | N/A  | 9  | Omsk                                           | Omsk                                    |
| 181 | N/A   | 7 | 58.187 | 68.243 | L-7  | 9  | Tobol'sk                                       | Tobolsk                                 |
| 182 | N/A   | 7 | 55.051 | 59.922 | L-6  | 9  | YUzhnyj ural, Syrostan                         | South Ural, Syrostan                    |
| 183 | N/A   | 5 | 56.508 | 84.973 | L-8  | 9  | Tomsk                                          | Tomsk                                   |
| 184 | N/A   | 5 | 53.651 | 52.448 | S-27 | 9  | Orenburgskaya oblast', Buguruslan              | Orenburg region, Buguruslan             |
| 185 | N/A   | 6 | 51.782 | 55.107 | S-29 | 9  | Orenburg                                       | Orenburg                                |
| 186 | N/A   | 6 | 63.933 | 65.042 | L-7  | 9  | Beryozov (Komi)                                | Berezov (Komi)                          |
| 187 | N/A   | 6 | 58.283 | 31.315 | S-14 | 9  | Il'men'                                        | Ilmen                                   |
| 188 | N/A   | 6 | 56.508 | 84.973 | L-8  | 9  | Tomsk                                          | Tomsk                                   |
| 189 | N/A   | 7 | 53.651 | 52.448 | S-27 | 9  | Orenburgskaya oblast', Buguruslan              | Orenburg region, Buguruslan             |
| 190 | N/A   | 5 | 57.167 | 65.501 | S-30 | 9  | Tyumen'                                        | Tyumen                                  |
| 191 | N/A   | 5 | 53.651 | 52.448 | S-27 | 9  | Orenburgskaya oblast', Buguruslan              | Orenburg region, Buguruslan             |
| 192 | N/A   | 4 | 53.651 | 52.448 | S-27 | 9  | Orenburgskaya oblast', Buguruslan              | Orenburg region, Buguruslan             |
| 193 | N/A   | 4 | 53.651 | 52.448 | S-27 | 9  | Orenburgskaya oblast', Buguruslan              | Orenburg region, Buguruslan             |
| 194 | N/A   | 3 | 56.025 | 93.061 | L-8  | 9  | Krasnoyarsk                                    | Krasnoyarsk                             |
| 195 | N/A   | 3 | 57.167 | 65.501 | S-30 | 9  | Tyumenskaya, Oblast'ast'                       | Tyumen region                           |
| 196 | N/A   | 4 | 58.187 | 68.243 | L-7  | 9  | Tobol'sk                                       | Tobolsk                                 |
| 197 | N/A   | 4 | 58.187 | 68.243 | L-7  | 9  | Tobol'sk                                       | Tobolsk                                 |
| 198 | N/A   | 4 | 58.283 | 31.315 | S-14 | 9  | Il'men'                                        | Ilmen                                   |
| 199 | N/A   | 4 | 58.283 | 31.315 | S-14 | 9  | Il'men'                                        | Ilmen                                   |
| 200 | N/A   | 3 | 56.183 | 51.332 | S-28 | 10 | Kirovskaya oblast'ast', Ust'-Lyusa             | Kirov region, Ust-Luce                  |
| 201 | N/A   | 5 | 59.848 | 48.284 | L-5  | 10 | Kirovskaya oblast'ast', Oparinskij rajon       | Kirov region, Oparinsky district        |
| 202 | N/A   | 6 | 56.366 | 50.998 | S-28 | 10 | Kirovskaya oblast', Karakul'naya pristan'      | Kirov region, Karakulnaya pier          |
| 203 | N/A   | 2 | 56.366 | 50.998 | S-28 | 10 | Kirovskaya oblast', Karakul'naya pristan'      | Kirov region, Karakulnaya pier          |
| 204 | N/A   | 3 | 58.832 | 47.884 | L-5  | 10 | Kirovskaya oblast'ast', Bobrov                 | Kirov region, Bobrov                    |
| 205 | N/A   | 5 | 59.848 | 48.284 | L-5  | 10 | Kirovskaya oblast'ast', Oparinskij rajon       | Kirov region, Oparinsky district        |
| 206 | N/A   | 4 | 56.183 | 51.332 | S-28 | 10 | Kirovskaya oblast'ast', Ust'-Lyusa             | Kirov region, Ust-Luce                  |

|     |          |   |        |        |      |    |                                             |                                    |
|-----|----------|---|--------|--------|------|----|---------------------------------------------|------------------------------------|
| 207 | N/A      | 3 | 59.848 | 48.284 | L-5  | 10 | Kirovskaya oblast'ast', Oparinskij rajon    | Kirov region, Oparinsky district   |
| 208 | N/A      | 5 | 56.183 | 51.332 | S-28 | 10 | Kirovskaya oblast'ast', Ust'-Lyusa          | Kirov region, Ust-Luce             |
| 209 | N/A      | 6 | 56.848 | 50.181 | S-28 | 10 | Kirovskaya oblast'ast', Lazorevo            | Kirov region, Azorevo              |
| 210 | N/A      | 7 | 56.183 | 51.332 | S-28 | 10 | Kirovskaya oblast'ast', Ust'-Lyusa          | Kirov region, Ust-Luce             |
| 211 | N/A      | 3 | 59.332 | 52.245 | L-5  | 10 | Kirovskaya oblast'ast', Ierhnekamskij rajon | Kirov region, Ierhnekamsk district |
| 212 | N/A      | 2 | 56.366 | 50.998 | S-28 | 10 | Kirovskaya oblast', Karakul'naya pristan'   | Kirov region, Karakulnaya pier     |
| 213 | N/A      | 3 | 56.366 | 50.998 | S-28 | 10 | Kirovskaya oblast', Karakul'naya pristan'   | Kirov region, Karakulnaya pier     |
| 214 | N/A      | 4 | 57.491 | 48.582 | S-28 | 10 | Kirovskaya oblast'ast', Pizhanskij rajon    | Kirov region, Pizhansky district   |
| 215 | N/A      | 2 | 56.183 | 51.332 | S-28 | 10 | Kirovskaya oblast'ast', Ust'-Lyusa          | Kirov region, Ust-Luce             |
| 216 | N/A      | 4 | 56.183 | 51.332 | S-28 | 10 | Kirovskaya oblast'ast', Ust'-Lyusa          | Kirov region, Ust-Luce             |
| 217 | N/A      | 6 | 55.002 | 23.838 | S-4  | 11 | Kauno, Litva                                | Kauno, Litva                       |
| 218 | N/A      | 4 | 54.928 | 23.699 | S-4  | 11 | Kacergine, Litva                            | Kacergine, Litva                   |
| 219 | N/A      | 4 | 54.966 | 24.167 | S-4  | 11 | Didysis raistas, Litva                      | Didysis raistas, Litva             |
| 220 | N/A      | 4 | 55.002 | 23.838 | S-4  | 11 | Kauno, Litva                                | Kauno, Litva                       |
| 221 | N/A      | 4 | 54.219 | 24.564 | S-4  | 11 | Varena, Litva                               | Varena, Litva                      |
| 222 | N/A      | 4 | 54.219 | 24.564 | S-4  | 11 | Varena, Litva                               | Varena, Litva                      |
| 223 | N/A      | 4 | 56.051 | 21.813 | S-2  | 11 | Plunges, Platelis                           | Plunges, Platelis                  |
| 224 | N/A      | 3 | 55.702 | 26.069 | S-6  | 11 | Zarasu, Litva                               | Zarasu, Litva                      |
| 225 | N/A      | 4 | 55.702 | 26.069 | S-6  | 11 | Zarasu, Litva                               | Zarasu, Litva                      |
| 226 | N/A      | 4 | 55.702 | 26.069 | S-6  | 11 | Zarasu, Litva                               | Zarasu, Litva                      |
| 227 | N/A      | 3 | 55.002 | 23.838 | S-4  | 11 | Kauno, Litva                                | Kauno, Litva                       |
| 228 | N/A      | 7 | 59.354 | 27.058 | S-7  | 12 | Pussi, Estonia                              | Pussi, Estonia                     |
| 229 | N/A      | 3 | 59.354 | 27.058 | S-7  | 12 | Pussi, Estonia                              | Pussi, Estonia                     |
| 230 | N/A      | 4 | 58.333 | 26.665 | S-7  | 12 | Lemmatsi, Estonia                           | Lemmatsi, Estonia                  |
| 231 | N/A      | 4 | 58.271 | 26.532 | S-7  | 12 | Noo, Estonia                                | Noo, Estonia                       |
| 232 | N/A      | 5 | 58.419 | 22.551 | S-7  | 12 | Saaremaa, Estonia                           | Saaremaa, Estonia                  |
| 233 | N/A      | 4 | 59.498 | 26.537 | S-7  | 12 | Kunda, Estonia                              | Kunda, Estonia                     |
| 234 | N/A      | 3 | 59.246 | 24.711 | S-7  | 12 | Todva, Estonia                              | Todva, Estonia                     |
| 235 | N/A      | 3 | 58.425 | 24.733 | S-7  | 12 | Tori-paikuse, Estonia                       | Tori-paikuse, Estonia              |
| 236 | N/A      | 4 | 59.166 | 27.651 | S-10 | 12 | Puhatu, Estonia                             | Puhatu, Estonia                    |
| 237 | N/A      | 5 | 58.073 | 24.726 | S-7  | 12 | Parnu                                       | Parnu                              |
| 238 | N/A      | 4 | 58.373 | 26.717 | S-7  | 12 | Tartumaa                                    | Tartumaa                           |
| 239 | R-21348  | 7 | 51.285 | 13.848 | N/A  | 7  | Bohra Sa                                    | Bohra sa                           |
| 240 | R-107271 | 3 | 48.948 | 15.042 | N/A  | 7  | Avstriya, Litsehau                          | Austria, Litsehau                  |
| 241 | R-76336  | 2 | 52.741 | 23.969 | S-4  | 7  | Belovezhskaya Pushcha                       | Bialowieza Forest                  |
| 242 | R-76337  | 4 | 52.741 | 23.969 | S-4  | 7  | Belovezhskaya Pushcha                       | Bialowieza Forest                  |
| 243 | R-11729  | 5 | 51.242 | 6.792  | N/A  | 7  | Vestfaliya                                  | Westphalia                         |
| 244 | 8758/12  | 3 | 48.955 | 28.743 | S-11 | 8  | Vinnickaya oblast'                          | Vinnytsia region                   |
| 245 | 20746/72 | 6 | 51.767 | 25.515 | S-5  | 8  | Volynskaya oblast', Lyubeshovsk. rajon      | Volyn region, Lyubeshovsk. area    |
| 246 | 17134/61 | 7 | 51.226 | 24.038 | S-3  | 8  | Volynskaya oblast', Lyuboml'sk. rajon       | Volyn region, Lyuboml'sk. area     |
| 247 | 13950    | 6 | 51.499 | 23.951 | S-3  | 3  | Volynskaya oblast', okr. SHacka             | Volyn region, env. Shatsk          |
| 248 | 13949    | 7 | 51.499 | 23.951 | S-3  | 3  | Volynskaya oblast', okr. SHacka             | Volyn region, env. Shatsk          |
| 249 | 13951    | 5 | 51.499 | 23.951 | S-3  | 3  | Volynskaya oblast', okr. SHacka             | Volyn region, env. Shatsk          |
| 250 | 26215/34 | 5 | 51.671 | 24.529 | S-3  | 8  | Volynskaya oblast', Ratnovsk. rajon         | Volyn region, Ratnovsk. area       |

|     |           |   |        |        |      |   |                                                  |                                              |
|-----|-----------|---|--------|--------|------|---|--------------------------------------------------|----------------------------------------------|
| 251 | 27133/41  | 5 | 47.661 | 33.692 | S-15 | 8 | Dnepropetrovskaya oblast', Apostolovskij rajon   | Dnipropetrovsk region, Apostolovsky district |
| 252 | 27507/80  | 5 | 47.661 | 33.692 | S-15 | 8 | Dnepropetrovskaya oblast', Apostolovskij rajon   | Dnipropetrovsk region, Apostolovsky district |
| 253 | 17011/58  | 6 | 47.598 | 37.495 | S-18 | 8 | Doneckaya oblast', Volnovahskij rajon            | Donetsk region, Volnovakha district          |
| 254 | 17012/59  | 5 | 47.598 | 37.495 | S-18 | 8 | Doneckaya oblast', Volnovahskij rajon            | Donetsk region, Volnovakha district          |
| 255 | 14630/50  | 7 | 50.253 | 28.662 | S-8  | 8 | ZHitomir                                         | Zhytomyr                                     |
| 256 | 26481/79  | 4 | 50.101 | 29.634 | S-8  | 8 | ZHitomirskaya oblast', Popel'nyanskij rajon      | Zhytomyr region, Popelnyan district          |
| 257 | 26480/78  | 3 | 50.101 | 29.634 | S-8  | 8 | ZHitomirskaya oblast', Popel'nyanskij rajon      | Zhytomyr region, Popelnyan district          |
| 258 | 21252/75  | 4 | 50.461 | 28.674 | S-8  | 8 | ZHitomirskaya oblast', CHernyahovskij rajon      | Zhytomyr region, Chernyakhovsky district     |
| 259 | 16493/57  | 7 | 48.212 | 22.636 | N/A  | 8 | Zakarpatskaya oblast', Beregovskij rajon         | Transcarpathian region, Beregovo district    |
| 260 | 16492/56  | 7 | 48.212 | 22.636 | N/A  | 8 | Zakarpatskaya oblast', Beregovskij rajon         | Transcarpathian region, Beregovo district    |
| 261 | 16490/54  | 7 | 48.212 | 22.636 | N/A  | 8 | Zakarpatskaya oblast', Beregovskij rajon         | Transcarpathian region, Beregovo district    |
| 262 | 35463/99  | 4 | 46.692 | 35.153 | L-1  | 8 | Zaporozhskaya oblast', Akimovskij rajon          | Zaporozhye region, Akimov district           |
| 263 | 19884/68  | 5 | 46.722 | 35.628 | L-1  | 8 | Zaporozhskaya oblast', Priazovskij rajon         | Zaporizhia region, Priazovsky district       |
| 264 | 7551      | 4 | 45.961 | 29.483 | L-1  | 4 | Izmail'skaya oblast'ast'                         | Izmail region                                |
| 265 | 7546      | 5 | 50.436 | 30.521 | S-12 | 4 | Kiev                                             | Kiev                                         |
| 266 | 8759/13   | 3 | 50.436 | 30.521 | S-12 | 8 | Kiev                                             | Kiev                                         |
| 267 | 8753/7    | 6 | 50.436 | 30.521 | S-12 | 8 | Kiev                                             | Kiev                                         |
| 268 | 8754/8    | 6 | 50.436 | 30.521 | S-12 | 8 | Kiev                                             | Kiev                                         |
| 269 | 8764/18   | 4 | 50.436 | 30.521 | S-12 | 8 | Kiev                                             | Kiev                                         |
| 270 | 8763/17   | 5 | 50.436 | 30.521 | S-12 | 8 | Kiev                                             | Kiev                                         |
| 271 | 8757/11   | 5 | 50.436 | 30.521 | S-12 | 8 | Kiev                                             | Kiev                                         |
| 272 | 41195/105 | 5 | 50.226 | 30.904 | S-12 | 8 | Kievskaya oblast', Borispol'skij rajon, Voronkov | Kiev region, Boryspil district, Voronkov     |
| 273 | 20659/98  | 4 | 51.367 | 29.448 | S-8  | 8 | Kievskaya oblast', Polesskij rajon, Vil'cha      | Kiev region, Polessky district, Vilcha       |
| 274 | 20662/70  | 4 | 51.367 | 29.448 | S-8  | 8 | Kievskaya oblast', Polesskij rajon, Vil'cha      | Kiev region, Polessky district, Vilcha       |
| 275 | 20660/86  | 5 | 51.367 | 29.448 | S-8  | 8 | Kievskaya oblast', Polesskij rajon, Vil'cha      | Kiev region, Polessky district, Vilcha       |
| 276 | 8784/38   | 6 | 51.367 | 29.448 | S-8  | 8 | Kievskaya oblast', Polesskij rajon, Vil'cha      | Kiev region, Polessky district, Vilcha       |
| 277 | 8778/32   | 7 | 53.225 | 50.173 | S-27 | 8 | Kujbyshevskaya oblast'                           | Kuybyshev region                             |
| 278 | R-60255   | 7 | 52.121 | 35.095 | S-19 | 7 | Kurskaya oblast', Dmitriev-L'govskij             | Kursk region, Dmitriev-Lgovsky               |
| 279 | R-60257   | 6 | 52.121 | 35.095 | S-19 | 7 | Kurskaya oblast', Dmitriev-L'govskij             | Kursk region, Dmitriev-Lgovsky               |
| 280 | R-44094   | 6 | 52.121 | 35.095 | S-19 | 7 | Kurskaya oblast', Dmitriev-L'govskij             | Kursk region, Dmitriev-Lgovsky               |
| 281 | R-60254   | 2 | 52.121 | 35.095 | S-19 | 7 | Kurskaya oblast', Dmitriev-L'govskij             | Kursk region, Dmitriev-Lgovsky               |
| 282 | R-60253   | 3 | 52.121 | 35.095 | S-19 | 7 | Kurskaya oblast', Dmitriev-L'govskij             | Kursk region, Dmitriev-Lgovsky               |
| 283 | R-44098   | 5 | 52.121 | 35.095 | S-19 | 7 | Kurskaya oblast', Dmitriev-L'govskij             | Kursk region, Dmitriev-Lgovsky               |
| 284 | R-44097   | 3 | 52.121 | 35.095 | S-19 | 7 | Kurskaya oblast', Dmitriev-L'govskij             | Kursk region, Dmitriev-Lgovsky               |
| 285 | R-60251   | 7 | 52.121 | 35.095 | S-19 | 7 | Kurskaya oblast', Dmitriev-L'govskij             | Kursk region, Dmitriev-Lgovsky               |
| 286 | 7547      | 5 | 50.436 | 30.521 | S-12 | 4 | okrestnosti Kieva, ZHukov ostrov                 | outskirts of Kiev, Zhukov island             |
| 287 | 7548      | 4 | 50.436 | 30.521 | S-12 | 4 | okrestnosti Kieva, Irnen'                        | surroundings of Kiev, Irnen                  |
| 288 | 7555      | 5 | 50.436 | 30.521 | S-12 | 4 | okrestnosti Kieva, Pushcha-Vodica                | outskirts of Kiev, Puscha-Voditsa            |
| 289 | 13138     | 4 | 49.592 | 34.549 | S-15 | 3 | Poltava                                          | Poltava                                      |
| 290 | 13132     | 7 | 49.592 | 34.549 | S-15 | 3 | Poltava                                          | Poltava                                      |
| 291 | 13131     | 4 | 49.592 | 34.549 | S-15 | 3 | Poltava                                          | Poltava                                      |

|     |          |   |        |        |      |   |                                                       |                                                    |
|-----|----------|---|--------|--------|------|---|-------------------------------------------------------|----------------------------------------------------|
| 292 | 13130    | 6 | 49.592 | 34.549 | S-15 | 3 | Poltava                                               | Poltava                                            |
| 293 | 13129    | 5 | 49.592 | 34.549 | S-15 | 3 | Poltava                                               | Poltava                                            |
| 294 | 13128    | 6 | 49.592 | 34.549 | S-15 | 3 | Poltava                                               | Poltava                                            |
| 295 | 13126    | 4 | 49.592 | 34.549 | S-15 | 3 | Poltava                                               | Poltava                                            |
| 296 | 13135    | 4 | 49.867 | 34.727 | S-15 | 3 | Poltavskij uezd, Get'manshchina                       | Poltava County, Hetman                             |
| 297 | 13137    | 4 | 48.945 | 34.108 | S-15 | 3 | Poltavskij uezd, Kovan'chino, r. Vorskla              | Poltava County, Kovankino, r. Vorskla              |
| 298 | 13139    | 7 | 48.945 | 34.108 | S-15 | 3 | Poltavskij uezd, Kovan'chino, r. Vorskla              | Poltava County, Kovankino, r. Vorskla              |
| 299 | 13143    | 6 | 48.945 | 34.108 | S-15 | 3 | Poltavskij uezd, Kovan'chino, r. Vorskla              | Poltava County, Kovankino, r. Vorskla              |
| 300 | 13141    | 4 | 49.751 | 35.196 | S-18 | 3 | Poltavskij uezd, reka Kolomak                         | Poltava County, Kolomak River                      |
| 301 | 13142    | 5 | 49.759 | 33.89  | S-15 | 3 | Poltavskij uezd, reka CHornen'ka                      | Poltava County, Chornya River                      |
| 302 | 17133/60 | 4 | 51.701 | 25.765 | S-5  | 8 | Rovenskaya oblast', Zarechnenskij rajon, Ostrovsk     | Rivne region, Zarechnensky district, Ostrovsk      |
| 303 | 8783/37  | 7 | 50.883 | 26.451 | S-5  | 8 | Rovenskaya Oblast', Kostopol'skij rajon               | Rivne Region, Kostopil Region                      |
| 304 | 8775/29  | 7 | 50.883 | 26.451 | S-5  | 8 | Rovenskaya Oblast', Kostopol'skij rajon               | Rivne Region, Kostopil Region                      |
| 305 | 21339    | 4 | 52.301 | 33.798 | S-16 | 3 | Sumskaya oblast', Seredinogubskij rajon, Staraya guba | Sumy region, Seredinogubsky district, Old Bay      |
| 306 | 21354    | 5 | 53.152 | 38.131 | S-21 | 3 | Tul'skaya oblast', Efremovskij rajon                  | Tula region, Efremovsky district                   |
| 307 | R-75278  | 3 | 53.924 | 37.691 | S-21 | 7 | Tul'skaya oblast', Novosil'skij rajon                 | Tula region, Novosilsky district                   |
| 308 | R-116306 | 3 | 54.351 | 38.263 | S-21 | 7 | Tul'skaya oblast', Venevskij rajon                    | Tula region, Venevsky district                     |
| 309 | R-75279  | 7 | 53.924 | 37.691 | S-21 | 7 | Tul'skaya oblast'ast', Novosil'skij rajon             | Tula region, Novosilsky district                   |
| 310 | R-75276  | 6 | 53.924 | 37.691 | S-21 | 7 | Tul'skaya oblast'ast', Novosil'skij rajon             | Tula region, Novosilsky district                   |
| 311 | R-11753  | 5 | 54.192 | 46.974 | S-26 | 7 | Ul'yanovskaya oblast', Karsunskij rajon               | Ulyanovsk region, Karsunsky district               |
| 312 | R-11755  | 2 | 54.192 | 46.974 | S-26 | 7 | Ul'yanovskaya oblast', Karsunskij rajon               | Ulyanovsk region, Karsunsky district               |
| 313 | R-11763  | 3 | 54.192 | 46.974 | S-26 | 7 | Ul'yanovskaya oblast', Karsunskij rajon               | Ulyanovsk region, Karsunsky district               |
| 314 | R-11762  | 5 | 53.789 | 47.511 | S-26 | 7 | Ul'yanovskaya oblast', Pronzino                       | Ulyanovsk region, Pronzino                         |
| 315 | R-11756  | 6 | 54.192 | 46.974 | S-26 | 7 | Ul'yanovskaya oblast', Karsunskij rajon               | Ulyanovsk region, Karsunsky district               |
| 316 | R-11750  | 3 | 54.192 | 46.974 | S-26 | 7 | Ul'yanovskaya oblast', Karsunskij rajon               | Ulyanovsk region, Karsunsky district               |
| 317 | R-11759  | 6 | 54.192 | 46.974 | S-26 | 7 | Ul'yanovskaya oblast', Karsunskij rajon               | Ulyanovsk region, Karsunsky district               |
| 318 | R-11760  | 6 | 54.192 | 46.974 | S-26 | 7 | Ul'yanovskaya oblast', Karsunskij rajon               | Ulyanovsk region, Karsunsky district               |
| 319 | 21348    | 6 | 49.992 | 36.206 | S-18 | 3 | Har'kov, Lozoven'ki                                   | Kharkov, Lozovenki                                 |
| 320 | 21350    | 7 | 49.992 | 36.206 | S-18 | 3 | Har'kov, Pomerki                                      | Kharkov, Pomerki                                   |
| 321 | 13145    | 6 | 49.638 | 36.636 | S-18 | 3 | Har'kovskaya oblast'                                  | Kharkov region                                     |
| 322 | 13146    | 4 | 49.638 | 36.636 | S-18 | 3 | Har'kovskaya oblast'ast'                              | Kharkiv region                                     |
| 323 | 21352    | 5 | 49.702 | 36.352 | S-18 | 3 | Har'kovskaya oblast', Zmievskij rajon, Severnyj Donec | Kharkiv region, Zmievsky district, Northern Donets |
| 324 | 21351    | 6 | 49.702 | 36.352 | S-18 | 3 | Har'kovskaya oblast', Zmievskij rajon, Severnyj Donec | Kharkiv region, Zmievsky district, Northern Donets |
| 325 | 21349    | 4 | 49.992 | 36.206 | S-18 | 3 | Har'kov, Pomerki                                      | Kharkov, Pomerki                                   |
| 326 | 19395/66 | 3 | 46.511 | 33.978 | L-1  | 8 | Hersonskaya oblast', CHaplinskij rajon, Askaniya-nova | Kherson region, Chaplinsky district, Askaniya-Nova |
| 327 | 8770/24  | 3 | 46.371 | 33.541 | L-1  | 8 | Hersonskaya oblast', CHaplinskij rajon, CHaplinka     | Kherson region, Chaplinsky district, Chaplinka     |
| 328 | 19394/65 | 3 | 46.511 | 33.978 | L-1  | 8 | Hersonskaya oblast', CHaplinskij rajon, Askaniya-nova | Kherson region, Chaplinsky district, Askaniya-Nova |

|     |           |   |        |        |      |   |                                                       |                                                  |
|-----|-----------|---|--------|--------|------|---|-------------------------------------------------------|--------------------------------------------------|
| 329 | 37780/97  | 5 | 51.135 | 30.964 | S-12 | 8 | CHernigovskaya oblast', Kozeleckij rajon, Samojlovka  | Chernihiv region, Kozelets district, Samoilkovka |
| 330 | 8760/14   | 4 | 51.042 | 31.888 | S-12 | 8 | CHernigovskaya oblast', Nezhinskij rajon, Nezhin      | Chernihiv region, Nezhinsky district, Nezhin     |
| 331 | 8749/3    | 2 | 51.812 | 31.091 | S-12 | 8 | CHernigovskaya oblast', Repkinskij rajon              | Chernihiv region, Repkinsky district             |
| 332 | 8765/19   | 5 | 51.812 | 31.091 | S-12 | 8 | CHernigovskaya oblast', Repkinskij rajon              | Chernihiv region, Repkinsky district             |
| 333 | 8756/10   | 5 | 51.812 | 31.091 | S-12 | 8 | CHernigovskaya oblast', Repkinskij rajon              | Chernihiv region, Repkinsky district             |
| 334 | 8752/6    | 3 | 51.812 | 31.091 | S-12 | 8 | CHernigovskaya oblast', Repkinskij rajon              | Chernihiv region, Repkinsky district             |
| 335 | 8755/9    | 3 | 51.812 | 31.091 | S-12 | 8 | CHernigovskaya oblast', Repkinskij rajon              | Chernihiv region, Repkinsky district             |
| 336 | 8762/16   | 4 | 51.812 | 31.091 | S-12 | 8 | CHernigovskaya oblast', Repkinskij rajon              | Chernihiv region, Repkinsky district             |
| 337 | 8748/2    | 5 | 51.812 | 31.091 | S-12 | 8 | CHernigovskaya oblast', Repkinskij rajon              | Chernihiv region, Repkinsky district             |
| 338 | 8751/5    | 5 | 51.918 | 30.965 | S-12 | 8 | CHernigovskaya oblast', Repkinskij rajon, Vir         | Chernihiv region, Repkinsky district, Vir        |
| 339 | 8781/35   | 7 | 51.918 | 30.965 | S-12 | 8 | CHernigovskaya oblast', Repkinskij rajon, Vir         | Chernihiv region, Repkinsky district, Vir        |
| 340 | 8772/26   | 7 | 51.967 | 30.931 | S-12 | 8 | CHernigovskaya oblast', Repkinskij rajon, Vir         | Chernihiv region, Repkinsky district, Vir        |
| 341 | 8773/27   | 6 | 51.967 | 30.931 | S-12 | 8 | CHernigovskaya oblast', Repkinskij rajon, Vir         | Chernihiv region, Repkinsky district, Vir        |
| 342 | 8747/1    | 4 | 51.967 | 30.931 | S-12 | 8 | CHernigovskaya oblast', Repkinskij rajon, Vir         | Chernihiv region, Repkinsky district, Vir        |
| 343 | 8792/46   | 5 | 51.967 | 30.931 | S-12 | 8 | CHernigovskaya oblast', Repkinskij rajon, Vir         | Chernihiv region, Repkinsky district, Vir        |
| 344 | 8767/21   | 6 | 51.967 | 30.931 | S-12 | 8 | CHernigovskaya oblast', Repkinskij rajon, Klubovka    | Chernihiv region, Repkinsky district, Klubovka   |
| 345 | 8766/20   | 4 | 51.951 | 30.949 | S-12 | 8 | CHernigovskaya oblast', Repkinskij rajon, Brekhunovka | Chernihiv region, Repkinsky district, Brehunovka |
| 346 | 8750/4    | 5 | 51.918 | 30.965 | S-12 | 8 | CHernigovskaya oblast', Repkinskij rajon, Vir         | Chernihiv region, Repkinsky district, Vir        |
| 347 | 8793/47   | 5 | 51.918 | 30.965 | S-12 | 8 | CHernigovskaya oblast', Repkinskij rajon, Vir         | Chernihiv region, Repkinsky district, Vir        |
| 348 | 21171/74  | 4 | 51.903 | 31.857 | S-12 | 8 | CHernigovskaya oblast', SHCHorskij rajon, Borovichi   | Chernihiv region, Shchorsky district, Borovichi  |
| 349 | R-60265   | 7 | 54.911 | 32.875 | S-16 | 7 | Smolensk. oblast'                                     | Smolensk. region                                 |
| 350 | R-60266   | 7 | 54.911 | 32.875 | S-16 | 7 | Smolensk. oblast'                                     | Smolensk. region                                 |
| 351 | R-60264   | 7 | 54.911 | 32.875 | S-16 | 7 | Smolensk. oblast'                                     | Smolensk. region                                 |
| 352 | R-60267   | 4 | 54.911 | 32.875 | S-16 | 7 | Smolensk. oblast'                                     | Smolensk. region                                 |
| 353 | R-60268   | 6 | 55.215 | 34.301 | S-17 | 7 | Smolenskaya oblast', Vyazemskij rajon                 | Smolensk region, Vyazemsky district              |
| 354 | 21344     | 3 | 55.066 | 32.686 | S-17 | 3 | Smolenskaya oblast', YArceveskij uезд                 | Smolensk region, Yartsevo district               |
| 355 | N/A       | 4 | 52.715 | 25.349 | S-4  | 6 | Belorussiya, Ivacevichsk. rajon                       | Belarus, Ivatsevichsky. area                     |
| 356 | N/A       | 5 | 52.051 | 27.932 | S-8  | 6 | Belorussiya, Gomel'sk. ZHitkovichsk. rajon. Hvoensk   | Belarus, Gomel. Zhitkovichsk. area. Hvoensk      |
| 357 | 1459/109  | 6 | 53.139 | 29.227 | S-9  | 6 | Belorussiya, Bobrujsk                                 | Belarus, Bobruisk                                |
| 358 | 1474\1645 | 4 | 54.783 | 33.413 | S-16 | 6 | Smolenskaya oblast', Dorogobuzhskij rajon, Aleksino   | Smolensk region, Dorogobuzh district, Aleksino   |
| 359 | 1460\2990 | 3 | 54.783 | 33.413 | S-16 | 6 | Smolenskaya oblast', Dorogobuzhskij rajon, Aleksino   | Smolensk region, Dorogobuzh district, Aleksino   |
| 360 | N/A       | 4 | 51.782 | 23.639 | S-3  | 6 | Brestskaya oblast'ast', Leninskij rajon, Dubeckaya    | Brest region, Leninsky district, Dubetskaya      |
| 361 | N/A       | 3 | 51.832 | 26.999 | S-5  | 6 | Brestskaya oblast', Stolinskij rajon, Koshara-ol'm    | Brest region, Stolin district, Koshara-olm       |
| 362 | N/A       | 4 | 52.741 | 23.969 | S-4  | 6 | Belovezhskaya Pushcha                                 | Bialowieza Forest                                |

|     |      |   |        |        |      |   |                                                        |                                                   |
|-----|------|---|--------|--------|------|---|--------------------------------------------------------|---------------------------------------------------|
| 363 | N/A  | 7 | 51.782 | 23.639 | S-3  | 6 | Brestskaya oblast'ast', Leninskij rajon, Dubeckaya     | Brest region, Leninsky district, Dubetskaya       |
| 364 | 1388 | 6 | 52.443 | 30.978 | S-12 | 6 | Gomel'                                                 | Gomel                                             |
| 365 | 1392 | 4 | 52.065 | 28.383 | S-8  | 6 | Mozyrskij rajon, Mordvin                               | Mozyr District, Mordvin                           |
| 366 | 1397 | 7 | 51.832 | 26.999 | S-5  | 6 | Brestskaya oblast', Stolinskij rajon, Koshara-ol'm     | Brest region, Stolin district, Koshara-olm        |
| 367 | 1387 | 6 | 51.832 | 26.999 | S-5  | 6 | Gomel'skaya oblast'                                    | Gomel region                                      |
| 368 | 1378 | 5 | 52.443 | 30.978 | S-12 | 6 | Gomel'                                                 | Gomel                                             |
| 369 | 1394 | 7 | 52.443 | 30.978 | S-12 | 6 | Gomel'                                                 | Gomel                                             |
| 370 | 1384 | 4 | 52.443 | 30.978 | S-12 | 6 | Gomel'                                                 | Gomel                                             |
| 371 | 1383 | 5 | 52.443 | 30.978 | S-12 | 6 | Gomel'                                                 | Gomel                                             |
| 372 | 1386 | 5 | 52.443 | 30.978 | S-12 | 6 | Gomel'                                                 | Gomel                                             |
| 373 | 1377 | 5 | 52.443 | 30.978 | S-12 | 6 | Gomel'                                                 | Gomel                                             |
| 374 | 2306 | 4 | 52.033 | 27.848 | S-8  | 6 | Gomel'skaya oblast', ZHitkovich rajon, Ozerany         | Gomel region, Zhitkovich district, Ozeryan        |
| 375 | N/A  | 7 | 49.837 | 24.034 | S-3  | 5 | L'vov                                                  | Lviv                                              |
| 376 | N/A  | 7 | 50.101 | 25.732 | S-5  | 5 | Ternopol', Kremenec                                    | Ternopil, Kremenets                               |
| 377 | N/A  | 7 | 52.626 | 20.385 | S-1  | 9 | Pol'sha, Plon'sk                                       | Poland, Plonsk                                    |
| 378 | N/A  | 6 | 50.597 | 27.607 | S-8  | 9 | ZHitomirskaya oblast', Novograd                        | Zhytomyr region, Novograd                         |
| 379 | N/A  | 5 | 50.436 | 30.521 | S-12 | 9 | Kiev                                                   | Kiev                                              |
| 380 | N/A  | 6 | 52.626 | 20.385 | S-1  | 9 | Pol'sha, Plon'sk                                       | Poland, Plonsk                                    |
| 381 | N/A  | 4 | 49.267 | 30.932 | S-11 | 9 | CHerkasska oblast', Lysnyanskij rajon, Pochapicy       | Cherkassk region, Lysnyansky district, Pochapitsy |
| 382 | N/A  | 7 | 49.267 | 30.932 | S-11 | 9 | CHerkasska oblast', Lysnyanskij rajon, Pochapicy       | Cherkassk region, Lysnyansky district, Pochapitsy |
| 383 | N/A  | 5 | 52.231 | 20.996 | S-1  | 9 | Varshava                                               | Warsaw                                            |
| 384 | N/A  | 6 | 52.231 | 20.996 | S-1  | 9 | Varshava                                               | Warsaw                                            |
| 385 | N/A  | 5 | 49.267 | 30.932 | S-11 | 9 | CHerkasska oblast', Lysnyanskij rajon, Pochapicy       | Cherkassk region, Lysnyansky district, Pochapitsy |
| 386 | N/A  | 7 | 52.626 | 20.385 | S-1  | 9 | Pol'sha, Plon'sk                                       | Poland, Plonsk                                    |
| 387 | N/A  | 5 | 49.267 | 30.932 | S-11 | 9 | CHerkasska oblast', Lysnyanskij rajon, Pochapicy       | Cherkassk region, Lysnyansky district, Pochapitsy |
| 388 | N/A  | 4 | 49.267 | 30.932 | S-11 | 9 | CHerkasska oblast', Lysnyanskij rajon, Pochapicy       | Cherkassk region, Lysnyansky district, Pochapitsy |
| 389 | N/A  | 7 | 46.694 | 31.236 | L-1  | 9 | Odesskaya oblast', Koblast'evo                         | Odessa region, Koblastievo                        |
| 390 | N/A  | 7 | 52.231 | 20.996 | S-1  | 9 | Varshava                                               | Warsaw                                            |
| 391 | N/A  | 7 | 52.231 | 20.996 | S-1  | 9 | Varshava                                               | Warsaw                                            |
| 392 | N/A  | 4 | 52.184 | 25.849 | S-5  | 9 | Pinsk, vyzhlovichi                                     | Pinsk, Vyzhlovichi                                |
| 393 | N/A  | 4 | 52.231 | 20.996 | S-1  | 9 | Varshava                                               | Warsaw                                            |
| 394 | N/A  | 4 | 52.231 | 20.996 | S-1  | 9 | Varshava                                               | Warsaw                                            |
| 395 | N/A  | 5 | 52.231 | 20.996 | S-1  | 9 | Varshava                                               | Warsaw                                            |
| 396 | N/A  | 5 | 50.049 | 29.633 | S-8  | 9 | ZHitomirskaya oblast', Popel'nyanskij rajon, Mohnachka | Zhytomyr region, Popelnyan district, Mokhnachka   |
| 397 | N/A  | 4 | 52.231 | 20.996 | S-1  | 9 | Varshava                                               | Warsaw                                            |

|     |          |   |        |        |      |   |                                                       |                                                   |
|-----|----------|---|--------|--------|------|---|-------------------------------------------------------|---------------------------------------------------|
| 398 | N/A      | 6 | 52.184 | 25.849 | S-5  | 9 | Pinsk, vyzhlovichi                                    | Pinsk, Vyzhlovichi                                |
| 399 | N/A      | 4 | 52.231 | 20.996 | S-1  | 9 | Varshava                                              | Warsaw                                            |
| 400 | N/A      | 7 | 52.231 | 20.996 | S-1  | 9 | Varshava                                              | Warsaw                                            |
| 401 | N/A      | 6 | 50.279 | 36.943 | S-19 | 9 | Har'kovskaya oblast'ast', Volchanskij rajon           | Kharkiv region, Volchansky district               |
| 402 | N/A      | 4 | 49.267 | 30.932 | S-11 | 9 | CHerkasska oblast', Lysnyanskij rajon, Pochapicy      | Cherkassk region, Lysnyansky district, Pochapitsy |
| 403 | N/A      | 5 | 49.267 | 30.932 | S-11 | 9 | CHerkasska oblast', Lysnyanskij rajon, Pochapicy      | Cherkassk region, Lysnyansky district, Pochapitsy |
| 404 | N/A      | 6 | 49.267 | 30.932 | S-11 | 9 | CHerkasska oblast', Lysnyanskij rajon, Pochapicy      | Cherkassk region, Lysnyansky district, Pochapitsy |
| 405 | N/A      | 6 | 52.231 | 20.996 | S-1  | 9 | Varshava                                              | Warsaw                                            |
| 406 | N/A      | 7 | 52.231 | 20.996 | S-1  | 9 | Varshava                                              | Warsaw                                            |
| 407 | N/A      | 5 | 50.346 | 22.236 | S-1  | 9 | Galiciya                                              | Galicia                                           |
| 408 | N/A      | 4 | 52.231 | 20.996 | S-1  | 9 | Varshava                                              | Warsaw                                            |
| 409 | N/A      | 7 | 50.148 | 26.182 | S-5  | 9 | Ternopol'sk oblast', Kremenskij rajon, Surazh         | Ternopil region, Kremensky district, Surazh       |
| 410 | N/A      | 3 | 54.911 | 32.875 | S-16 | 9 | Smolenskaya oblast'                                   | Smolensk region                                   |
| 411 | N/A      | 4 | 52.601 | 36.349 | S-19 | 9 | Orlovskaya oblast', Karachaeuskij rajon               | Oryol region, Karachay district                   |
| 412 | N/A      | 5 | 51.097 | 40.041 | L-2  | 9 | Voronezhskaya oblast'ast', Bobrovskij rajon           | Voronezh region, Bobrovsky district               |
| 413 | N/A      | 4 | 55.788 | 49.173 | S-28 | 9 | Kazan'                                                | Kazan                                             |
| 414 | N/A      | 5 | 53.934 | 39.101 | S-21 | 9 | Ryazanskaya oblast'ast', Mihajlovskij rajon, Nyuhovec | Ryazan region, Mikhailovsky district, Nyukhovets  |
| 415 | N/A      | 4 | 53.924 | 37.691 | S-21 | 9 | Tul'skaya oblast'ast', Novosil'skij rajon.            | Tula region, Novosilsky district.                 |
| 416 | N/A      | 4 | 53.152 | 38.131 | S-21 | 9 | Tul'skaya oblast', Efremovskij rajon                  | Tula region, Efremovsky district                  |
| 417 | N/A      | 6 | 51.097 | 40.041 | L-2  | 9 | Voronezhskaya oblast'ast', Bobrovskij rajon           | Voronezh region, Bobrovsky district               |
| 418 | N/A      | 6 | 53.934 | 38.801 | S-21 | 9 | Granica Tula-Ryazan'                                  | Border Tula-Ryazan                                |
| 419 | N/A      | 7 | 53.934 | 38.801 | S-21 | 9 | Granica Tula-Ryazan'                                  | Border Tula-Ryazan                                |
| 420 | N/A      | 7 | 51.097 | 40.041 | L-2  | 9 | Voronezhskaya oblast'ast', Bobrovskij rajon           | Voronezh region, Bobrovsky district               |
| 421 | R-3840   | 6 | 45.20  | 34.29  | N/A  | 7 | Krym                                                  | Crimea                                            |
| 422 | R-6128   | 4 | 55.31  | 35.42  | S-20 | 7 | Moskovskaya oblast', Mozhajskij rajon                 | Moscow region, Mozhaisky district                 |
| 423 | R-11728  | 6 | 57.32  | 26.57  | S-6  | 7 | Liflyandiya, Marienburg, Volkskij uezd                | Livonia, Marienburg, Volk County                  |
| 424 | R-11761  | 7 | 53.39  | 48.30  | S-26 | 7 | Ul'yanovskaya oblast', Gremyachij klyuch              | Ulyanovsk region, Gremyachy key                   |
| 425 | R-11767  | 6 | 56.53  | 74.22  | N/A  | 7 | Tobol'skaya oblast', v 12 verstah ot goroda Tara      | Tobolsk region, 12 versts from the city of Tara   |
| 426 | R-15995  | 6 | 52.00  | 56.55  | S-29 | 7 | YUzhnyj Ural, Ziyangurinskij                          | South Ural, Zyngurinsky                           |
| 427 | R-24065  | 4 | 44.35  | 40.06  | N/A  | 7 | Majkop                                                | Maykop                                            |
| 428 | R-60210  | 7 | 55.41  | 38.13  | S-22 | 7 | Moskovskaya oblast', Noginskij rajon                  | Moscow region, Noginsk district                   |
| 429 | R-60228  | 6 | 55.41  | 38.13  | S-22 | 7 | Moskovskaya oblast', Noginskij rajon                  | Moscow region, Noginsk district                   |
| 430 | R-60258  | 6 | 56.45  | 38.41  | S-22 | 7 | YAroslavskaya oblast', Ozero Pleshchevo               | Yaroslavl region, Lake Pleshevo                   |
| 431 | R-75277  | 7 | 53.16  | 37.11  | S-21 | 7 | Tul'skaya oblast', Novosil'skij rajon                 | Tula region, Novosilsky district                  |
| 432 | R-102886 | 3 | 42.24  | 47.45  | N/A  | 7 | Dagestan, Izberbashskij rajon, selo Utamysh           | Dagestan, Izberbash district, village Utamysh     |

|                                  |                                                                                                                                                                                                                                                                                                                                                                                                                                                                                                                                                                                                                                                                                                                                                                                                                                                                                                                      |
|----------------------------------|----------------------------------------------------------------------------------------------------------------------------------------------------------------------------------------------------------------------------------------------------------------------------------------------------------------------------------------------------------------------------------------------------------------------------------------------------------------------------------------------------------------------------------------------------------------------------------------------------------------------------------------------------------------------------------------------------------------------------------------------------------------------------------------------------------------------------------------------------------------------------------------------------------------------|
| <b>Colour type</b>               | Drost's colour score value                                                                                                                                                                                                                                                                                                                                                                                                                                                                                                                                                                                                                                                                                                                                                                                                                                                                                           |
| <b>Latitude.S-N</b>              | Latitude                                                                                                                                                                                                                                                                                                                                                                                                                                                                                                                                                                                                                                                                                                                                                                                                                                                                                                             |
| <b>Longitude.W-E</b>             | Longitude                                                                                                                                                                                                                                                                                                                                                                                                                                                                                                                                                                                                                                                                                                                                                                                                                                                                                                            |
| <b>Location (transliterated)</b> | Place of bird detection indicated on tag (transliterated)                                                                                                                                                                                                                                                                                                                                                                                                                                                                                                                                                                                                                                                                                                                                                                                                                                                            |
| <b>Location (translated)</b>     | Place of bird detection indicated on tag (machine translation)                                                                                                                                                                                                                                                                                                                                                                                                                                                                                                                                                                                                                                                                                                                                                                                                                                                       |
| <b>Population ID</b>             | Population IDs formed by the bird skins; labled as L-1, L-2, etc. for large populations and S-1, S-2, etc. for small populations, respectively (please also see Fig. S4 and Table S2). N/A - skins of birds not included in any population.                                                                                                                                                                                                                                                                                                                                                                                                                                                                                                                                                                                                                                                                          |
| <b>Museum</b>                    | Museum identifier:<br>[2] Collection of the Department of Biogeography of the Faculty of Geography of the M. V. Lomonosov Moscow State University (Moscow)<br>[3] State Museum of Nature of the Kharkiv National V.N. Karazin University (Kharkiv)<br>[4] Zoological Museum of Kyiv National Taras Shevchenko University (Kiev)<br>[5] Zoological Museum of Lviv National I. Frank University (Lviv)<br>[6] Zoological Museum of the Belarusian State University (Minsk)<br>[7] Zoological Museum of the M. V. Lomonosov Moscow State University (Moscow)<br>[8] Zoological Museum of the National Academy of Sciences of Ukraine (Kiev)<br>[9] Zoological Museum of the Zoological Institute of the Russian Academy of Sciences (St. Petersburg)<br>[10] Kirov City Zoological Museum (Kirov)<br>[11] Kaunas Zoological T. Ivanauskas Museum (Kaunas)<br>[12] Museum of Natural History of Tartu University (Tartu) |
